# Supplementary material for: CO2 activation and dissociation on In2O3(110) supported PdnPt(4−n) (n = 0–4) catalysts: a density functional theory study
Source: Royal Society of Chemistry journal article supplement (doi:10.1039/d1cp01015h), 2021-01-01
Supplement: d1cp01015h1.pdf [file d1cp01015h1.pdf]

## PdnPt(4-n)/In<sub>2</sub>O<sub>3</sub> catalysts models

Pt4/In2O3

|                     |                     |                     |
|---------------------|---------------------|---------------------|
| 1.000000000000000   |                     |                     |
| 10.2175998688000007 | 0.0000000000000000  | 0.0000000000000000  |
| 0.0000000000000000  | 14.4497995377000006 | 0.0000000000000000  |
| 0.0000000000000000  | 0.0000000000000000  | 17.9857006073000001 |

|    |    |    |
|----|----|----|
| O  | In | Pt |
| 48 | 32 | 4  |

Selective dynamics

Direct

|                    |                    |                    |   |   |   |
|--------------------|--------------------|--------------------|---|---|---|
| 0.1819400070000015 | 0.5179200199999983 | 0.1472299930000034 | F | F | F |
| 0.6819400070000015 | 0.0179200010000002 | 0.1472299930000034 | F | F | F |
| 0.6799630430074957 | 0.0271345123959957 | 0.3142087952073199 | T | T | T |
| 0.1817179092379596 | 0.5175432562429229 | 0.3274973734267047 | T | T | T |
| 0.9130420671722591 | 0.3758284822438426 | 0.4371471828891474 | T | T | T |
| 0.4079660861120107 | 0.8837175374501078 | 0.4378008402517349 | T | T | T |
| 0.4267539097423516 | 0.6785574006262343 | 0.4241215586548748 | T | T | T |
| 0.9156860225165383 | 0.1629943135551819 | 0.4267118766624952 | T | T | T |
| 0.9545099699999966 | 0.3958000000000013 | 0.2385899980000019 | F | F | F |
| 0.4545100160000004 | 0.8957999670000021 | 0.2385899980000019 | F | F | F |
| 0.6433245737306827 | 0.7884018062734054 | 0.3267416962150896 | T | T | T |
| 0.1455048541621339 | 0.2859555646114896 | 0.3373060963828153 | T | T | T |
| 0.4545100160000004 | 0.1542000070000000 | 0.2206899999999976 | F | F | F |
| 0.9545099699999966 | 0.6542000230000014 | 0.2206899999999976 | F | F | F |
| 0.1454900069999994 | 0.7638599679999984 | 0.1325899919999998 | F | F | F |
| 0.6454899840000010 | 0.2638599839999998 | 0.1325899919999998 | F | F | F |
| 0.1903399939999986 | 0.2862900060000015 | 0.1438599980000035 | F | F | F |
| 0.6903399589999992 | 0.7862899730000024 | 0.1438599980000035 | F | F | F |
| 0.9096599470000015 | 0.8817800340000019 | 0.2205699929999980 | F | F | F |
| 0.4096599940000019 | 0.3817800010000028 | 0.2205699929999980 | F | F | F |
| 0.4096599940000019 | 0.6682199560000015 | 0.2387099910000003 | F | F | F |
| 0.9096599470000015 | 0.1682200059999985 | 0.2387099910000003 | F | F | F |
| 0.6898021112970583 | 0.2664370437242382 | 0.3141022652859193 | T | T | T |
| 0.1865782501176249 | 0.7612044279453878 | 0.3130984983903706 | T | T | T |
| 0.4180599930000000 | 0.7820899849999989 | 0.1111999929999996 | F | F | F |
| 0.9180600400000003 | 0.2820900179999981 | 0.1111999929999996 | F | F | F |
| 0.9190479466142425 | 0.7659324465881210 | 0.3522734327950481 | T | T | T |
| 0.4208279871720652 | 0.2649356458392920 | 0.3470450160519634 | T | T | T |
| 0.6819400070000015 | 0.4224300249999970 | 0.2239500100000029 | F | F | F |
| 0.1819400070000015 | 0.9224299589999987 | 0.2239500100000029 | F | F | F |
| 0.1819400070000015 | 0.1275800049999987 | 0.2353300010000012 | F | F | F |

|                    |                    |                    |   |   |   |
|--------------------|--------------------|--------------------|---|---|---|
| 0.6819400070000015 | 0.6275799969999980 | 0.2353300010000012 | F | F | F |
| 0.6358335049046191 | 0.3883114654144719 | 0.4315713139701490 | T | T | T |
| 0.1358285574283958 | 0.8966302133530600 | 0.4281015322283028 | T | T | T |
| 0.9564894776754931 | 0.0117615513343107 | 0.3346056679283121 | T | T | T |
| 0.4562912672537340 | 0.5153629524215363 | 0.3361356642788154 | T | T | T |
| 0.1520773141999759 | 0.6517782818989797 | 0.4430731528726422 | T | T | T |
| 0.6429369125466601 | 0.1485747894028545 | 0.4413387462022308 | T | T | T |
| 0.4545100160000004 | 0.5361400390000028 | 0.1258399929999996 | F | F | F |
| 0.9545099699999966 | 0.0361399980000030 | 0.1258399929999996 | F | F | F |
| 0.4096599940000019 | 0.0137100000000032 | 0.1145799960000033 | F | F | F |
| 0.9096599470000015 | 0.5137100339999989 | 0.1145799960000033 | F | F | F |
| 0.7128357032142475 | 0.9172468678394415 | 0.4489286757329503 | T | T | T |
| 0.3153999698666230 | 0.3919848900924185 | 0.4734306463002370 | T | T | T |
| 0.1998020458911306 | 0.1309098756774807 | 0.4364932962180707 | T | T | T |
| 0.6983844006555792 | 0.6443893948461041 | 0.4304446034633871 | T | T | T |
| 0.8992358828559286 | 0.5369859647286525 | 0.3508717773477686 | T | T | T |
| 0.4067239331326433 | 0.0387299212661887 | 0.3443131030716447 | T | T | T |
| 0.7999999999999972 | 0.7581899819999975 | 0.2431499850000023 | F | F | F |
| 0.3000000230000026 | 0.7918100090000024 | 0.2161299999999997 | F | F | F |
| 0.3000000230000026 | 0.2581899979999989 | 0.2431499850000023 | F | F | F |
| 0.7999999999999972 | 0.2918100090000024 | 0.2161299999999997 | F | F | F |
| 0.8336300499999965 | 0.0250000010000022 | 0.2296400190000014 | F | F | F |
| 0.7693041280331768 | 0.2664018118906111 | 0.4273815431123077 | T | T | T |
| 0.3336300030000032 | 0.5249999790000004 | 0.2296400190000014 | F | F | F |
| 0.2640229606595474 | 0.7754448384573295 | 0.4269726263441370 | T | T | T |
| 0.5434866252733154 | 0.9168778465593328 | 0.3477720274257531 | T | T | T |
| 0.5499999999999972 | 0.1331900059999995 | 0.1157099910000028 | F | F | F |
| 0.0341958756681161 | 0.4118121309204192 | 0.3452176090259954 | T | T | T |
| 0.0499999999999972 | 0.6331899899999982 | 0.1157099910000028 | F | F | F |
| 0.7945440251849238 | 0.0443358630045239 | 0.4173209999318528 | T | T | T |
| 0.2802676917458526 | 0.9994921869704492 | 0.4319148334514858 | T | T | T |
| 0.3020628639153330 | 0.5436755777458311 | 0.4300281066773329 | T | T | T |
| 0.7924345327257580 | 0.4975549058689678 | 0.4510293180996903 | T | T | T |
| 0.7622675166112192 | 0.7835698736282636 | 0.4256562078684900 | T | T | T |
| 0.8336300499999965 | 0.5249999790000004 | 0.2296400190000014 | F | F | F |
| 0.2773515046400993 | 0.2633870957694945 | 0.4300785919092469 | T | T | T |
| 0.3336300030000032 | 0.0250000010000022 | 0.2296400190000014 | F | F | F |
| 0.0489791486232984 | 0.8813421821089934 | 0.3185138875274899 | T | T | T |
| 0.0499999999999972 | 0.1668099999999981 | 0.1427199939999966 | F | F | F |
| 0.5479959597162783 | 0.3831982886792503 | 0.3192190811946757 | T | T | T |
| 0.5499999999999972 | 0.6668099509999976 | 0.1427199939999966 | F | F | F |
| 0.5499999999999972 | 0.4000000200000002 | 0.1292199969999999 | F | F | F |
| 0.0478647912171081 | 0.1481435851154588 | 0.3355460650665034 | T | T | T |
| 0.5499999999999972 | 0.8999999540000019 | 0.1292199969999999 | F | F | F |

|                    |                    |                    |   |   |   |
|--------------------|--------------------|--------------------|---|---|---|
| 0.0505195536661425 | 0.6454255314258321 | 0.3364783323017322 | T | T | T |
| 0.0499999999999972 | 0.4000000200000002 | 0.1292199969999999 | F | F | F |
| 0.0499999999999972 | 0.8999999540000019 | 0.1292199969999999 | F | F | F |
| 0.5502634457101748 | 0.6507798510763371 | 0.3288966320602602 | T | T | T |
| 0.5535877330157322 | 0.1487727388096571 | 0.3310199653936947 | T | T | T |
| 0.5463487090982956 | 0.6202003640375777 | 0.5058162718353764 | T | T | T |
| 0.3600279918490961 | 0.5539360609242127 | 0.5814392025059100 | T | T | T |
| 0.6878474702606853 | 0.5132971162795869 | 0.5826549574406789 | T | T | T |
| 0.4986171402265359 | 0.4373074616020720 | 0.5127579978053926 | T | T | T |

### PdPt3/In2O3

1.0000000000000000

10.2175998688000007      0.0000000000000000      0.0000000000000000

0.0000000000000000      14.4497995377000006      0.0000000000000000

0.0000000000000000      0.0000000000000000      17.9857006073000001

| O  | In | Pd | Pt |
|----|----|----|----|
| 48 | 32 | 1  | 3  |

### Selective dynamics

#### Direct

|                    |                    |                    |   |   |   |
|--------------------|--------------------|--------------------|---|---|---|
| 0.1819400070000015 | 0.5179200199999983 | 0.1472299930000034 | F | F | F |
| 0.6819400070000015 | 0.0179200010000002 | 0.1472299930000034 | F | F | F |
| 0.6799822452147029 | 0.0271267616899955 | 0.3142145505868038 | T | T | T |
| 0.1817786035472239 | 0.5179013519340520 | 0.3276602117804445 | T | T | T |
| 0.9116469370323682 | 0.3764378642650728 | 0.4371653939613049 | T | T | T |
| 0.4090574246000860 | 0.8839798197779352 | 0.4383367925034292 | T | T | T |
| 0.4236505131148900 | 0.6777130494210254 | 0.4229387030449652 | T | T | T |
| 0.9153943683824034 | 0.1632846111238904 | 0.4264802162695567 | T | T | T |
| 0.9545099699999966 | 0.3958000000000013 | 0.2385899980000019 | F | F | F |
| 0.4545100160000004 | 0.8957999670000021 | 0.2385899980000019 | F | F | F |
| 0.6431425236889703 | 0.7882321305643276 | 0.3266265044107674 | T | T | T |
| 0.1445420941492553 | 0.2859488108726418 | 0.3368365931411543 | T | T | T |
| 0.4545100160000004 | 0.1542000070000000 | 0.2206899999999976 | F | F | F |
| 0.9545099699999966 | 0.6542000230000014 | 0.2206899999999976 | F | F | F |
| 0.1454900069999994 | 0.7638599679999984 | 0.1325899919999998 | F | F | F |
| 0.6454899840000010 | 0.2638599839999998 | 0.1325899919999998 | F | F | F |
| 0.1903399939999986 | 0.2862900060000015 | 0.1438599980000035 | F | F | F |
| 0.6903399589999992 | 0.7862899730000024 | 0.1438599980000035 | F | F | F |
| 0.9096599470000015 | 0.8817800340000019 | 0.2205699929999980 | F | F | F |
| 0.4096599940000019 | 0.3817800010000028 | 0.2205699929999980 | F | F | F |
| 0.4096599940000019 | 0.6682199560000015 | 0.2387099910000003 | F | F | F |
| 0.9096599470000015 | 0.1682200059999985 | 0.2387099910000003 | F | F | F |
| 0.6893246895966345 | 0.2663197393342465 | 0.3138872789442181 | T | T | T |
| 0.1862736699064413 | 0.7612468807672960 | 0.3128992693281579 | T | T | T |

|                    |                    |                    |   |   |   |
|--------------------|--------------------|--------------------|---|---|---|
| 0.4180599930000000 | 0.7820899849999989 | 0.1111999929999996 | F | F | F |
| 0.9180600400000003 | 0.2820900179999981 | 0.1111999929999996 | F | F | F |
| 0.9192297193612358 | 0.7661228563588135 | 0.3519693604041303 | T | T | T |
| 0.4200256958832930 | 0.2646604602655216 | 0.3471410658756846 | T | T | T |
| 0.6819400070000015 | 0.4224300249999970 | 0.2239500100000029 | F | F | F |
| 0.1819400070000015 | 0.9224299589999987 | 0.2239500100000029 | F | F | F |
| 0.1819400070000015 | 0.1275800049999987 | 0.2353300010000012 | F | F | F |
| 0.6819400070000015 | 0.6275799969999980 | 0.2353300010000012 | F | F | F |
| 0.6342982780787819 | 0.3882452522534414 | 0.4311220057319034 | T | T | T |
| 0.1368974294252182 | 0.8968089632542433 | 0.4278054671747519 | T | T | T |
| 0.9564595369178774 | 0.0117487949753047 | 0.3344686872278291 | T | T | T |
| 0.4567946710481705 | 0.5151124046048681 | 0.3355200493966379 | T | T | T |
| 0.1504597924665502 | 0.6522092764530510 | 0.4436146321413180 | T | T | T |
| 0.6430150034425277 | 0.1486647869461184 | 0.4412225292583208 | T | T | T |
| 0.4545100160000004 | 0.5361400390000028 | 0.1258399929999996 | F | F | F |
| 0.9545099699999966 | 0.0361399980000030 | 0.1258399929999996 | F | F | F |
| 0.4096599940000019 | 0.0137100000000032 | 0.1145799960000033 | F | F | F |
| 0.9096599470000015 | 0.5137100339999989 | 0.1145799960000033 | F | F | F |
| 0.7143268226930437 | 0.9167001762226916 | 0.4486044250680195 | T | T | T |
| 0.3130776177467995 | 0.3923436338934570 | 0.4718535936507379 | T | T | T |
| 0.1990804614089981 | 0.1305412374642926 | 0.4364449714962524 | T | T | T |
| 0.6988944215295120 | 0.6439844552267312 | 0.4300070069161502 | T | T | T |
| 0.8990968262369894 | 0.5369738534703876 | 0.3507736624041062 | T | T | T |
| 0.4067129913743905 | 0.0386893601305372 | 0.3442798519722175 | T | T | T |
| 0.7999999999999972 | 0.7581899819999975 | 0.2431499850000023 | F | F | F |
| 0.3000000230000026 | 0.7918100090000024 | 0.2161299999999997 | F | F | F |
| 0.3000000230000026 | 0.2581899979999989 | 0.2431499850000023 | F | F | F |
| 0.7999999999999972 | 0.2918100090000024 | 0.2161299999999997 | F | F | F |
| 0.8336300499999965 | 0.0250000010000022 | 0.2296400190000014 | F | F | F |
| 0.7689375052794885 | 0.2667157652726896 | 0.4271485926792754 | T | T | T |
| 0.3336300030000032 | 0.5249999790000004 | 0.2296400190000014 | F | F | F |
| 0.2644157832207315 | 0.7754802615938308 | 0.4265959014616753 | T | T | T |
| 0.5437969666359115 | 0.9167591925782278 | 0.3478125747315016 | T | T | T |
| 0.5499999999999972 | 0.1331900059999995 | 0.1157099910000028 | F | F | F |
| 0.0338921082399575 | 0.4122308399316740 | 0.3454125623987802 | T | T | T |
| 0.0499999999999972 | 0.6331899899999982 | 0.1157099910000028 | F | F | F |
| 0.7946793728274142 | 0.0443125382082857 | 0.4173025369155515 | T | T | T |
| 0.2812300082015425 | 0.9995749627533996 | 0.4322452464840540 | T | T | T |
| 0.3027316706903339 | 0.5453362122909238 | 0.4298968479363142 | T | T | T |
| 0.7915237882714552 | 0.4988278975251500 | 0.4512256548245576 | T | T | T |
| 0.7624349698366396 | 0.7827116748157958 | 0.4253798211895637 | T | T | T |
| 0.8336300499999965 | 0.5249999790000004 | 0.2296400190000014 | F | F | F |
| 0.2756400499625817 | 0.2630849515333339 | 0.4297451868090467 | T | T | T |
| 0.3336300030000032 | 0.0250000010000022 | 0.2296400190000014 | F | F | F |

|                    |                    |                    |   |   |   |
|--------------------|--------------------|--------------------|---|---|---|
| 0.0491661599963035 | 0.8813710620625086 | 0.3185382172667977 | T | T | T |
| 0.049999999999972  | 0.166809999999981  | 0.142719993999966  | F | F | F |
| 0.5474771902771008 | 0.3829570919810986 | 0.3188575512072691 | T | T | T |
| 0.549999999999972  | 0.666809950999976  | 0.142719993999966  | F | F | F |
| 0.549999999999972  | 0.4000000200000002 | 0.129219996999999  | F | F | F |
| 0.0475275025158970 | 0.1480834560640158 | 0.3353702409719702 | T | T | T |
| 0.549999999999972  | 0.8999999540000019 | 0.129219996999999  | F | F | F |
| 0.0502941911730243 | 0.6454661885866545 | 0.3367571487095296 | T | T | T |
| 0.049999999999972  | 0.4000000200000002 | 0.129219996999999  | F | F | F |
| 0.049999999999972  | 0.8999999540000019 | 0.129219996999999  | F | F | F |
| 0.5503408796313458 | 0.6504859267804532 | 0.3293821535005614 | T | T | T |
| 0.5533206501061287 | 0.1487358769024716 | 0.3310731767683795 | T | T | T |
| 0.5469062349618392 | 0.6245186519511958 | 0.5062852194215237 | T | T | T |
| 0.3642512107629959 | 0.5529326170791660 | 0.5813875385290732 | T | T | T |
| 0.4959994675220363 | 0.4355509966130246 | 0.5108967227041989 | T | T | T |
| 0.6819346536007262 | 0.5118939741230767 | 0.5815733945069378 | T | T | T |

### Pd2Pt2/In2O3

1.000000000000000

10.2175998688000007      0.0000000000000000      0.0000000000000000

0.0000000000000000      14.4497995377000006      0.0000000000000000

0.0000000000000000      0.0000000000000000      17.9857006073000001

O    In   Pd   Pt  
48   32   2   2

### Selective dynamics

#### Direct

|                    |                    |                    |   |   |   |
|--------------------|--------------------|--------------------|---|---|---|
| 0.1819400070000015 | 0.5179200199999983 | 0.1472299930000034 | F | F | F |
| 0.6819400070000015 | 0.0179200010000002 | 0.1472299930000034 | F | F | F |
| 0.6798136340267052 | 0.0272362360224550 | 0.3141224179211281 | T | T | T |
| 0.1816287550486098 | 0.5180394388532623 | 0.3270579588575125 | T | T | T |
| 0.9137394751596239 | 0.3764946026369843 | 0.4376396286109546 | T | T | T |
| 0.4083138359187687 | 0.8839864775308148 | 0.4381082975490499 | T | T | T |
| 0.4236593856874937 | 0.6770014334425350 | 0.4230722921984305 | T | T | T |
| 0.9151727254868484 | 0.1635017194236316 | 0.4263994360464323 | T | T | T |
| 0.9545099699999966 | 0.3958000000000013 | 0.2385899980000019 | F | F | F |
| 0.4545100160000004 | 0.8957999670000021 | 0.2385899980000019 | F | F | F |
| 0.6429275199125760 | 0.7883367311550590 | 0.3265627072817422 | T | T | T |
| 0.1443654635976667 | 0.2860679513795811 | 0.3361735712968356 | T | T | T |
| 0.4545100160000004 | 0.1542000070000000 | 0.2206899999999976 | F | F | F |
| 0.9545099699999966 | 0.6542000230000014 | 0.2206899999999976 | F | F | F |
| 0.1454900069999994 | 0.7638599679999984 | 0.1325899919999998 | F | F | F |
| 0.6454899840000010 | 0.2638599839999998 | 0.1325899919999998 | F | F | F |
| 0.1903399939999986 | 0.2862900060000015 | 0.1438599980000035 | F | F | F |

|                    |                    |                    |   |   |   |
|--------------------|--------------------|--------------------|---|---|---|
| 0.6903399589999992 | 0.7862899730000024 | 0.1438599980000035 | F | F | F |
| 0.9096599470000015 | 0.8817800340000019 | 0.2205699929999980 | F | F | F |
| 0.4096599940000019 | 0.3817800010000028 | 0.2205699929999980 | F | F | F |
| 0.4096599940000019 | 0.6682199560000015 | 0.2387099910000003 | F | F | F |
| 0.9096599470000015 | 0.1682200059999985 | 0.2387099910000003 | F | F | F |
| 0.6889575363563011 | 0.2656065531870752 | 0.3134322558405312 | T | T | T |
| 0.1860502988895764 | 0.7612553508136152 | 0.3128914622354023 | T | T | T |
| 0.4180599930000000 | 0.7820899849999989 | 0.1111999929999996 | F | F | F |
| 0.9180600400000003 | 0.2820900179999981 | 0.1111999929999996 | F | F | F |
| 0.9189907784668117 | 0.7661107996855983 | 0.3518270622573536 | T | T | T |
| 0.4199039162492278 | 0.2649510644891317 | 0.3473907368090867 | T | T | T |
| 0.6819400070000015 | 0.4224300249999970 | 0.2239500100000029 | F | F | F |
| 0.1819400070000015 | 0.9224299589999987 | 0.2239500100000029 | F | F | F |
| 0.1819400070000015 | 0.1275800049999987 | 0.2353300010000012 | F | F | F |
| 0.6819400070000015 | 0.6275799969999980 | 0.2353300010000012 | F | F | F |
| 0.6375814264190602 | 0.3891465293225719 | 0.4301577818147030 | T | T | T |
| 0.1366768408517283 | 0.8965694840625121 | 0.4279312510292060 | T | T | T |
| 0.9564927150152578 | 0.0118126542573292 | 0.3344746543994555 | T | T | T |
| 0.4564773072053402 | 0.5148625113879379 | 0.3359982349771131 | T | T | T |
| 0.1509019075911440 | 0.6515118662692699 | 0.4434534100100821 | T | T | T |
| 0.6429800900493085 | 0.1491058064093058 | 0.4413749324254647 | T | T | T |
| 0.4545100160000004 | 0.5361400390000028 | 0.1258399929999996 | F | F | F |
| 0.9545099699999966 | 0.0361399980000030 | 0.1258399929999996 | F | F | F |
| 0.4096599940000019 | 0.0137100000000032 | 0.1145799960000033 | F | F | F |
| 0.9096599470000015 | 0.5137100339999989 | 0.1145799960000033 | F | F | F |
| 0.7139425111260198 | 0.9169409838012459 | 0.4486876003241185 | T | T | T |
| 0.3103249459818194 | 0.3941832727093849 | 0.4722462475169373 | T | T | T |
| 0.1997880128700975 | 0.1315108583960370 | 0.4359177145415391 | T | T | T |
| 0.6989729062641695 | 0.6441135465570101 | 0.4300305749298690 | T | T | T |
| 0.8987697691367149 | 0.5369128461415471 | 0.3506820789544926 | T | T | T |
| 0.4067416067130710 | 0.0386011941886378 | 0.3442893240329730 | T | T | T |
| 0.7999999999999972 | 0.7581899819999975 | 0.2431499850000023 | F | F | F |
| 0.3000000230000026 | 0.7918100090000024 | 0.2161299999999997 | F | F | F |
| 0.3000000230000026 | 0.2581899979999989 | 0.2431499850000023 | F | F | F |
| 0.7999999999999972 | 0.2918100090000024 | 0.2161299999999997 | F | F | F |
| 0.8336300499999965 | 0.0250000010000022 | 0.2296400190000014 | F | F | F |
| 0.7693249122343958 | 0.2673321355090039 | 0.4266920712941662 | T | T | T |
| 0.3336300030000032 | 0.5249999790000004 | 0.2296400190000014 | F | F | F |
| 0.2644149791154757 | 0.7749286193909477 | 0.4265593010859615 | T | T | T |
| 0.5436602425941309 | 0.9168732896634573 | 0.3479704647288433 | T | T | T |
| 0.5499999999999972 | 0.1331900059999995 | 0.1157099910000028 | F | F | F |
| 0.0340382320042014 | 0.4124582566985799 | 0.3454123960840813 | T | T | T |
| 0.0499999999999972 | 0.6331899899999982 | 0.1157099910000028 | F | F | F |
| 0.7941957084041663 | 0.0447344953830771 | 0.4171406756279228 | T | T | T |

|                    |                    |                    |   |   |   |
|--------------------|--------------------|--------------------|---|---|---|
| 0.2804775642760686 | 0.9998337537539689 | 0.4320473423937080 | T | T | T |
| 0.3020457007825064 | 0.5434825047699281 | 0.4301026444268520 | T | T | T |
| 0.7909637151507710 | 0.4979768587677434 | 0.4512343258550296 | T | T | T |
| 0.7622081568312851 | 0.7829352053468842 | 0.4252209528917059 | T | T | T |
| 0.8336300499999965 | 0.5249999790000004 | 0.2296400190000014 | F | F | F |
| 0.2745497732393648 | 0.2653291904795561 | 0.4296962829105234 | T | T | T |
| 0.3336300030000032 | 0.0250000010000022 | 0.2296400190000014 | F | F | F |
| 0.0490194996813966 | 0.8813612390147089 | 0.3186239114069389 | T | T | T |
| 0.049999999999972  | 0.166809999999981  | 0.1427199939999966 | F | F | F |
| 0.5478604881843704 | 0.3829203910109475 | 0.3193159792379144 | T | T | T |
| 0.549999999999972  | 0.6668099509999976 | 0.1427199939999966 | F | F | F |
| 0.549999999999972  | 0.4000000200000002 | 0.1292199969999999 | F | F | F |
| 0.0479584357808157 | 0.1481405417110664 | 0.3355965815975135 | T | T | T |
| 0.549999999999972  | 0.8999999540000019 | 0.1292199969999999 | F | F | F |
| 0.0501946226892019 | 0.6452245885704802 | 0.3367492600707482 | T | T | T |
| 0.049999999999972  | 0.4000000200000002 | 0.1292199969999999 | F | F | F |
| 0.049999999999972  | 0.8999999540000019 | 0.1292199969999999 | F | F | F |
| 0.5502535050651738 | 0.6503419897518271 | 0.3294516676341170 | T | T | T |
| 0.5528553956254957 | 0.1487960201399306 | 0.3313074144942718 | T | T | T |
| 0.5466826448356351 | 0.6228549406281700 | 0.5056720035719355 | T | T | T |
| 0.4982802601540444 | 0.4332908680618459 | 0.5121527178690863 | T | T | T |
| 0.6828001753694652 | 0.5133313531818893 | 0.5822535045096805 | T | T | T |
| 0.3657727606419058 | 0.5514934821656284 | 0.5808456303780546 | T | T | T |

### Pd3Pt/In2O3

1.0000000000000000

|                     |                     |                     |
|---------------------|---------------------|---------------------|
| 10.2175998688000007 | 0.0000000000000000  | 0.0000000000000000  |
| 0.0000000000000000  | 14.4497995377000006 | 0.0000000000000000  |
| 0.0000000000000000  | 0.0000000000000000  | 17.9857006073000001 |

|    |    |    |    |
|----|----|----|----|
| O  | In | Pt | Pd |
| 48 | 32 | 3  | 1  |

### Selective dynamics

Direct

|                    |                    |                    |   |   |   |
|--------------------|--------------------|--------------------|---|---|---|
| 0.1807543798434423 | 0.5162538237694605 | 0.1512043039725839 | F | F | F |
| 0.6867331648872721 | 0.0158818785048425 | 0.1357593882947938 | F | F | F |
| 0.6766414812704771 | 0.0270437600982412 | 0.3054048712483423 | T | T | T |
| 0.1769443161836889 | 0.5156439621160462 | 0.3308543051855865 | T | T | T |
| 0.9068380994306082 | 0.3722286138436259 | 0.4391790459717245 | T | T | T |
| 0.4082978548815677 | 0.8839366314131066 | 0.4358676264939107 | T | T | T |
| 0.4242314798825191 | 0.6792236350912909 | 0.4187100641701125 | T | T | T |
| 0.9108378282596629 | 0.1603304345396132 | 0.4238000732168768 | T | T | T |
| 0.9450799309904454 | 0.3949137382621473 | 0.2406382233922884 | F | F | F |
| 0.4498348853838863 | 0.8944098537147553 | 0.2378850734373970 | F | F | F |

|                    |                    |                    |   |   |   |
|--------------------|--------------------|--------------------|---|---|---|
| 0.6400712314414848 | 0.7873304615432115 | 0.3199890319741257 | T | T | T |
| 0.1389002863147525 | 0.2858323213085521 | 0.3362015667251699 | T | T | T |
| 0.4506829856441144 | 0.1562864535042010 | 0.2199716243710412 | F | F | F |
| 0.9531867801323415 | 0.6508200817200276 | 0.2315927730873852 | F | F | F |
| 0.1235194602030347 | 0.7633182738237210 | 0.1192328848650419 | F | F | F |
| 0.6220816049528040 | 0.2662430303350263 | 0.1167990547483697 | F | F | F |
| 0.1847204470617640 | 0.2834701942544982 | 0.1421490377690660 | F | F | F |
| 0.6863511734632226 | 0.7794004407303419 | 0.1356497127132670 | F | F | F |
| 0.9048060281166812 | 0.8786951925684647 | 0.2178137984176516 | F | F | F |
| 0.4028361214298215 | 0.3825364446881210 | 0.2206066545489023 | F | F | F |
| 0.4007667692523285 | 0.6606687395001529 | 0.2333385266651575 | F | F | F |
| 0.9019097346236151 | 0.1644847735247978 | 0.2361565933850613 | F | F | F |
| 0.6866148040929382 | 0.2638976853044752 | 0.3066967395351630 | T | T | T |
| 0.1852684187712386 | 0.7586656995687125 | 0.3075106233685315 | T | T | T |
| 0.4197002433186228 | 0.7828804674168026 | 0.1072047259510924 | F | F | F |
| 0.9204640714685439 | 0.2842971093496018 | 0.1082328699634658 | F | F | F |
| 0.9172180225613176 | 0.7672207736344840 | 0.3524173692933192 | T | T | T |
| 0.4153862927899249 | 0.2650271803344957 | 0.3451721959097359 | T | T | T |
| 0.6792027412891244 | 0.4193365147432928 | 0.2199050104824849 | F | F | F |
| 0.1829787504853755 | 0.9181241793272505 | 0.2193989454229737 | F | F | F |
| 0.1787785573954537 | 0.1273573764215428 | 0.2409161868268015 | F | F | F |
| 0.6793035704335466 | 0.6256299155370684 | 0.2335465721899439 | F | F | F |
| 0.6310076778478789 | 0.3850329921743287 | 0.4288665520217549 | T | T | T |
| 0.1364820978465441 | 0.8969566882009123 | 0.4242474314393345 | T | T | T |
| 0.9533634413494911 | 0.0092395859465279 | 0.3287941895645946 | T | T | T |
| 0.4543781826627785 | 0.5134367139379619 | 0.3345742300234760 | T | T | T |
| 0.1536129798355734 | 0.6534467880805042 | 0.4450305672760568 | T | T | T |
| 0.6392358192964971 | 0.1461306899741757 | 0.4365204352728627 | T | T | T |
| 0.4821831014900013 | 0.5327713444985207 | 0.1126132989927768 | F | F | F |
| 0.9840656240798111 | 0.0333763322357683 | 0.1205712731739439 | F | F | F |
| 0.4183975654083980 | 0.0177015755663987 | 0.1083088574149187 | F | F | F |
| 0.9181600780561610 | 0.5195208245786844 | 0.1128711899190691 | F | F | F |
| 0.7049793214756559 | 0.9170201767819627 | 0.4412672199224302 | T | T | T |
| 0.3053579954478843 | 0.3906326091819288 | 0.4762349655173731 | T | T | T |
| 0.1979831205284946 | 0.1299854809763661 | 0.4351403770601029 | T | T | T |
| 0.6923361964042762 | 0.6437707856146353 | 0.4266738163161791 | T | T | T |
| 0.8938500204569961 | 0.5343506246160984 | 0.3538022503106732 | T | T | T |
| 0.4035871928709671 | 0.0371115498261960 | 0.3392698620921643 | T | T | T |
| 0.7941335826688771 | 0.7558469454495054 | 0.2363368113538584 | F | F | F |
| 0.2970848907517407 | 0.7884673272029303 | 0.2051338737269148 | F | F | F |
| 0.2927772407109543 | 0.2571588202315169 | 0.2412161475842041 | F | F | F |
| 0.7919741836641592 | 0.2884247962807223 | 0.2033595043939727 | F | F | F |
| 0.8325523384839428 | 0.0232203766249484 | 0.2204340848359010 | F | F | F |
| 0.7646723875335290 | 0.2643031509220595 | 0.4221768465408183 | T | T | T |



|                    |                    |                    |   |   |   |
|--------------------|--------------------|--------------------|---|---|---|
| 0.3246404835850853 | 0.5212303917651866 | 0.2338612095294366 | F | F | F |
| 0.2643975592814947 | 0.7764885646567491 | 0.4218680978959834 | T | T | T |
| 0.5423123381003170 | 0.9170000577401904 | 0.3452856896274252 | T | T | T |
| 0.5554632793807883 | 0.1273601989640341 | 0.1218561316796425 | F | F | F |
| 0.0263922731475883 | 0.4104908904767378 | 0.3475723684031996 | T | T | T |
| 0.0533799802195176 | 0.6280077327186717 | 0.1298751863179675 | F | F | F |
| 0.7904741490364413 | 0.0425547369727384 | 0.4094172816901205 | T | T | T |
| 0.2812654676021449 | 0.9996901551856511 | 0.4290119650937528 | T | T | T |
| 0.3021090653202964 | 0.5433956904462247 | 0.4306506548124601 | T | T | T |
| 0.7837126928132818 | 0.4940741970814044 | 0.4516233987295595 | T | T | T |
| 0.7554906591850409 | 0.7822687203722074 | 0.4209733149119230 | T | T | T |
| 0.8301862885156268 | 0.5232948929866339 | 0.2274043651788205 | F | F | F |
| 0.2723365419765877 | 0.2637013684375816 | 0.4285880502023157 | T | T | T |
| 0.3331054255992214 | 0.0242575550271624 | 0.2216880139098762 | F | F | F |
| 0.0478629573219046 | 0.8788598543403368 | 0.3164478990839609 | T | T | T |
| 0.0449977269881643 | 0.1710424189286712 | 0.1452445867000662 | F | F | F |
| 0.5466505082621226 | 0.3808626976455577 | 0.3174273136445025 | T | T | T |
| 0.5429923449161720 | 0.6677726747146693 | 0.1378465744492203 | F | F | F |
| 0.5425068565244828 | 0.4004511714331684 | 0.1318192897994521 | F | F | F |
| 0.0461858951412929 | 0.1450344777817985 | 0.3361989634012268 | T | T | T |
| 0.5516039013307648 | 0.8971695595514362 | 0.1311604450889021 | F | F | F |
| 0.0447765932967883 | 0.6447793909243080 | 0.3426551222344357 | T | T | T |
| 0.0481446970045738 | 0.3986436433700646 | 0.1342522577617586 | F | F | F |
| 0.0468560485094400 | 0.8981606690356401 | 0.1317025983878750 | F | F | F |
| 0.5469320111434135 | 0.6491402760851449 | 0.3247924308084903 | T | T | T |
| 0.5480860701792486 | 0.1480818589131251 | 0.3286143570655139 | T | T | T |
| 0.4891129711973728 | 0.4361858809247048 | 0.5120628785715183 | T | T | T |
| 0.5391918303721944 | 0.6190260093910844 | 0.5018893253262957 | T | T | T |
| 0.6764399847759505 | 0.5138485980520405 | 0.5818289605224379 | T | T | T |
| 0.3569496731145727 | 0.5548036847615917 | 0.5836291261793026 | T | T | T |

### Pd4/In2O3

1.00000000000000

10.2175998688000007      0.0000000000000000      0.0000000000000000

0.0000000000000000      14.4497995377000006      0.0000000000000000

0.0000000000000000      0.0000000000000000      17.9857006073000001

O      In      Pd

48      32      4

### Selective dynamics

#### Direct

|                    |                    |                    |   |   |   |
|--------------------|--------------------|--------------------|---|---|---|
| 0.1819400070000015 | 0.5179200199999983 | 0.1472299930000034 | F | F | F |
| 0.6819400070000015 | 0.0179200010000002 | 0.1472299930000034 | F | F | F |
| 0.6799139495799047 | 0.0265534961592835 | 0.3144838440250898 | T | T | T |

|                    |                    |                    |   |   |   |
|--------------------|--------------------|--------------------|---|---|---|
| 0.1814281119526207 | 0.5171690356592527 | 0.3272654304625494 | T | T | T |
| 0.9101421134592109 | 0.3771158859058309 | 0.4383322463386569 | T | T | T |
| 0.4081853549019622 | 0.8830752675657477 | 0.4379309262728165 | T | T | T |
| 0.4239665732519315 | 0.6769701380708927 | 0.4235002946254279 | T | T | T |
| 0.9155302905381623 | 0.1627028858646431 | 0.4268439348755736 | T | T | T |
| 0.9545099699999966 | 0.3958000000000013 | 0.2385899980000019 | F | F | F |
| 0.4545100160000004 | 0.8957999670000021 | 0.2385899980000019 | F | F | F |
| 0.6432654461705845 | 0.7880938952608071 | 0.3269566045056125 | T | T | T |
| 0.1443424609100290 | 0.2861339855780829 | 0.3377332567591099 | T | T | T |
| 0.4545100160000004 | 0.1542000070000000 | 0.2206899999999976 | F | F | F |
| 0.9545099699999966 | 0.6542000230000014 | 0.2206899999999976 | F | F | F |
| 0.1454900069999994 | 0.7638599679999984 | 0.1325899919999998 | F | F | F |
| 0.6454899840000010 | 0.2638599839999998 | 0.1325899919999998 | F | F | F |
| 0.1903399939999986 | 0.2862900060000015 | 0.1438599980000035 | F | F | F |
| 0.6903399589999992 | 0.7862899730000024 | 0.1438599980000035 | F | F | F |
| 0.9096599470000015 | 0.8817800340000019 | 0.2205699929999980 | F | F | F |
| 0.4096599940000019 | 0.3817800010000028 | 0.2205699929999980 | F | F | F |
| 0.4096599940000019 | 0.6682199560000015 | 0.2387099910000003 | F | F | F |
| 0.9096599470000015 | 0.1682200059999985 | 0.2387099910000003 | F | F | F |
| 0.6895684577289606 | 0.2655490601178056 | 0.3137981149920784 | T | T | T |
| 0.1858304134502363 | 0.7604517931720962 | 0.3128859909420850 | T | T | T |
| 0.4180599930000000 | 0.7820899849999989 | 0.1111999929999996 | F | F | F |
| 0.9180600400000003 | 0.2820900179999981 | 0.1111999929999996 | F | F | F |
| 0.9192689673041924 | 0.7657065654836304 | 0.3521189891582484 | T | T | T |
| 0.4199401839711034 | 0.2649295447346222 | 0.3474222399208796 | T | T | T |
| 0.6819400070000015 | 0.4224300249999970 | 0.2239500100000029 | F | F | F |
| 0.1819400070000015 | 0.9224299589999987 | 0.2239500100000029 | F | F | F |
| 0.1819400070000015 | 0.1275800049999987 | 0.2353300010000012 | F | F | F |
| 0.6819400070000015 | 0.6275799969999980 | 0.2353300010000012 | F | F | F |
| 0.6346105752957260 | 0.3877961952421629 | 0.4300605400784177 | T | T | T |
| 0.1359317856721544 | 0.8956787111280928 | 0.4281181161908473 | T | T | T |
| 0.9564313017281344 | 0.0114695614317495 | 0.3347034218706346 | T | T | T |
| 0.4571206204024242 | 0.5147182153782043 | 0.3352990868940673 | T | T | T |
| 0.1512598757180456 | 0.6503786861701348 | 0.4439941803216865 | T | T | T |
| 0.6428950242866257 | 0.1482765253346355 | 0.4414581007298068 | T | T | T |
| 0.4545100160000004 | 0.5361400390000028 | 0.1258399929999996 | F | F | F |
| 0.9545099699999966 | 0.0361399980000030 | 0.1258399929999996 | F | F | F |
| 0.4096599940000019 | 0.0137100000000032 | 0.1145799960000033 | F | F | F |
| 0.9096599470000015 | 0.5137100339999989 | 0.1145799960000033 | F | F | F |
| 0.7139325806262167 | 0.9162952438007641 | 0.4494101261396672 | T | T | T |
| 0.3112752040451278 | 0.3913807363389168 | 0.4766063994478466 | T | T | T |
| 0.1994047180269375 | 0.1301556011696597 | 0.4362038740629255 | T | T | T |
| 0.6998966495272946 | 0.6438639823389524 | 0.4304896825900049 | T | T | T |
| 0.8981443441237796 | 0.5364211845962700 | 0.3508060084063238 | T | T | T |

|                    |                    |                    |   |   |   |
|--------------------|--------------------|--------------------|---|---|---|
| 0.4066328431767460 | 0.0383497645425872 | 0.3444229979597260 | T | T | T |
| 0.7999999999999972 | 0.7581899819999975 | 0.2431499850000023 | F | F | F |
| 0.3000000230000026 | 0.7918100090000024 | 0.2161299999999997 | F | F | F |
| 0.3000000230000026 | 0.2581899979999989 | 0.2431499850000023 | F | F | F |
| 0.7999999999999972 | 0.2918100090000024 | 0.2161299999999997 | F | F | F |
| 0.8336300499999965 | 0.0250000010000022 | 0.2296400190000014 | F | F | F |
| 0.7692062032103506 | 0.2660745944955170 | 0.4270574239626160 | T | T | T |
| 0.3336300030000032 | 0.5249999790000004 | 0.2296400190000014 | F | F | F |
| 0.2640082896973868 | 0.7743819391998273 | 0.4263349615563685 | T | T | T |
| 0.5431823291467240 | 0.9164188685944329 | 0.3478381963292066 | T | T | T |
| 0.5499999999999972 | 0.1331900059999995 | 0.1157099910000028 | F | F | F |
| 0.0325401412279606 | 0.4119852341391742 | 0.3458937352561088 | T | T | T |
| 0.0499999999999972 | 0.6331899899999982 | 0.1157099910000028 | F | F | F |
| 0.7945958928980585 | 0.0437009353950222 | 0.4174558736561097 | T | T | T |
| 0.2801240957303251 | 0.9987756673608622 | 0.4318939286409020 | T | T | T |
| 0.3044553931930556 | 0.5442940540264214 | 0.4278381215500786 | T | T | T |
| 0.7866863743653980 | 0.4988417491667765 | 0.4511402866986956 | T | T | T |
| 0.7630139310778682 | 0.7826440523580871 | 0.4255495928097625 | T | T | T |
| 0.8336300499999965 | 0.5249999790000004 | 0.2296400190000014 | F | F | F |
| 0.2758188294921346 | 0.2631108630725184 | 0.4303550165002169 | T | T | T |
| 0.3336300030000032 | 0.0250000010000022 | 0.2296400190000014 | F | F | F |
| 0.0487973072174477 | 0.8810108155085737 | 0.3184270211558447 | T | T | T |
| 0.0499999999999972 | 0.1668099999999981 | 0.1427199939999966 | F | F | F |
| 0.5481703297125990 | 0.3823815470432783 | 0.3178750574964749 | T | T | T |
| 0.5499999999999972 | 0.6668099509999976 | 0.1427199939999966 | F | F | F |
| 0.5499999999999972 | 0.4000000200000002 | 0.1292199969999999 | F | F | F |
| 0.0476041986518986 | 0.1479937007329376 | 0.3354001521079961 | T | T | T |
| 0.5499999999999972 | 0.8999999540000019 | 0.1292199969999999 | F | F | F |
| 0.0496859943689566 | 0.6446693158654011 | 0.3368146516228913 | T | T | T |
| 0.0499999999999972 | 0.4000000200000002 | 0.1292199969999999 | F | F | F |
| 0.0499999999999972 | 0.8999999540000019 | 0.1292199969999999 | F | F | F |
| 0.5506249653949427 | 0.6507251805968730 | 0.3295397309175270 | T | T | T |
| 0.5530742774632527 | 0.1483645501151034 | 0.3312516085744615 | T | T | T |
| 0.3560608293226237 | 0.5506920933930439 | 0.5811298999748893 | T | T | T |
| 0.6838754207356440 | 0.5087119672984995 | 0.5849860750323098 | T | T | T |
| 0.5458598117468726 | 0.6183938605084268 | 0.5066454716101114 | T | T | T |
| 0.4958683296952500 | 0.4371565530203027 | 0.5100197030524313 | T | T | T |

## CO<sub>2</sub> adsorption on Pd<sub>n</sub>Pt(4-n)/In<sub>2</sub>O<sub>3</sub> catalysts

Pt4/In<sub>2</sub>O<sub>3</sub>

|                     |                     |                     |
|---------------------|---------------------|---------------------|
| 1.000000000000000   |                     |                     |
| 10.2175998688000007 | 0.0000000000000000  | 0.0000000000000000  |
| 0.0000000000000000  | 14.4497995377000006 | 0.0000000000000000  |
| 0.0000000000000000  | 0.0000000000000000  | 20.9857006073000001 |

|    |    |    |   |
|----|----|----|---|
| O  | In | Pt | C |
| 50 | 32 | 4  | 1 |

Selective dynamics

Direct

|                    |                    |                    |   |   |   |
|--------------------|--------------------|--------------------|---|---|---|
| 0.1819400070000015 | 0.5179200199999983 | 0.1152000000000015 | F | F | F |
| 0.6819400070000015 | 0.0179200010000002 | 0.1152000000000015 | F | F | F |
| 0.6798458645008909 | 0.0324191792156943 | 0.2510948292134095 | T | T | T |
| 0.1797853885985107 | 0.5177982686142327 | 0.2653852585926430 | T | T | T |
| 0.9104927654140789 | 0.3772637029174626 | 0.3582005340548794 | T | T | T |
| 0.4087596731407810 | 0.8825238365716762 | 0.3575342370615927 | T | T | T |
| 0.4245982567721349 | 0.6751973106292741 | 0.3494452744610927 | T | T | T |
| 0.9149897415235411 | 0.1635859001903566 | 0.3491757137211348 | T | T | T |
| 0.9545099699999966 | 0.3958000000000013 | 0.1866899999999987 | F | F | F |
| 0.4545100160000004 | 0.8957999670000021 | 0.1866899999999987 | F | F | F |
| 0.6430194001779355 | 0.7849186914534728 | 0.2648403503973890 | T | T | T |
| 0.1428716972025872 | 0.2856458952018435 | 0.2725608647366454 | T | T | T |
| 0.4545100160000004 | 0.1542000070000000 | 0.1726800109999971 | F | F | F |
| 0.9545099699999966 | 0.6542000230000014 | 0.1726800109999971 | F | F | F |
| 0.1454900069999994 | 0.7638599679999984 | 0.1037499959999977 | F | F | F |
| 0.6454899840000010 | 0.2638599839999998 | 0.1037499959999977 | F | F | F |
| 0.1903399939999986 | 0.2862900060000015 | 0.1125700079999987 | F | F | F |
| 0.6903399589999992 | 0.7862899730000024 | 0.1125700079999987 | F | F | F |
| 0.9096599470000015 | 0.8817800340000019 | 0.1725899979999994 | F | F | F |
| 0.4096599940000019 | 0.3817800010000028 | 0.1725899979999994 | F | F | F |
| 0.4096599940000019 | 0.6682199560000015 | 0.1867800019999990 | F | F | F |
| 0.9096599470000015 | 0.1682200059999985 | 0.1867800019999990 | F | F | F |
| 0.6894797118403487 | 0.2682929661525317 | 0.2535344549457061 | T | T | T |
| 0.1862329492272554 | 0.7612268410384412 | 0.2529519316597843 | T | T | T |
| 0.4180599930000000 | 0.7820899849999989 | 0.0870100030000032 | F | F | F |
| 0.9180600400000003 | 0.2820900179999981 | 0.0870100030000032 | F | F | F |
| 0.9164147674612297 | 0.7651671397810649 | 0.2863703958718902 | T | T | T |
| 0.4184030202286087 | 0.2650524110011228 | 0.2801145085134773 | T | T | T |
| 0.6819400070000015 | 0.4224300249999970 | 0.1752299990000026 | F | F | F |
| 0.1819400070000015 | 0.9224299589999987 | 0.1752299990000026 | F | F | F |
| 0.1819400070000015 | 0.1275800049999987 | 0.1841400010000029 | F | F | F |
| 0.6819400070000015 | 0.6275799969999980 | 0.1841400010000029 | F | F | F |

|                    |                    |                    |   |   |   |
|--------------------|--------------------|--------------------|---|---|---|
| 0.6326296240372693 | 0.3880880504662754 | 0.3540034592945757 | T | T | T |
| 0.1365503634496721 | 0.8966851615245791 | 0.3514650072227702 | T | T | T |
| 0.9573903652026137 | 0.0117980413783137 | 0.2699096609702747 | T | T | T |
| 0.4541266899584229 | 0.5147729551177248 | 0.2713876966948341 | T | T | T |
| 0.1507923012161198 | 0.6519320806252219 | 0.3647320492782940 | T | T | T |
| 0.6414784056399181 | 0.1507970672022608 | 0.3625145050535687 | T | T | T |
| 0.4545100160000004 | 0.5361400390000028 | 0.0984700050000029 | F | F | F |
| 0.9545099699999966 | 0.0361399980000030 | 0.0984700050000029 | F | F | F |
| 0.4096599940000019 | 0.0137100000000032 | 0.0896599969999983 | F | F | F |
| 0.9096599470000015 | 0.5137100339999989 | 0.0896599969999983 | F | F | F |
| 0.7089643302564317 | 0.9196678516363299 | 0.3587297965633434 | T | T | T |
| 0.3121588721087022 | 0.3922788933606469 | 0.3877509826669458 | T | T | T |
| 0.1998750645458960 | 0.1299590336760619 | 0.3567067601630813 | T | T | T |
| 0.6926382171559984 | 0.6350711903868156 | 0.3489546375887891 | T | T | T |
| 0.8990654312409531 | 0.5364837281810079 | 0.2826677901346553 | T | T | T |
| 0.4073239251523676 | 0.0383215025400737 | 0.2778679031200773 | T | T | T |
| 0.7248693181539940 | 0.7682770091479469 | 0.4536171491315106 | T | T | T |
| 0.5422068625459632 | 0.7587437783840736 | 0.5158937207140553 | T | T | T |
| 0.7999999999999972 | 0.7581899819999975 | 0.1902599909999978 | F | F | F |
| 0.3000000230000026 | 0.7918100090000024 | 0.1691199950000026 | F | F | F |
| 0.3000000230000026 | 0.2581899979999989 | 0.1902599909999978 | F | F | F |
| 0.7999999999999972 | 0.2918100090000024 | 0.1691199950000026 | F | F | F |
| 0.8336300499999965 | 0.0250000010000022 | 0.1796899989999972 | F | F | F |
| 0.7686613827338643 | 0.2669801830214552 | 0.3505092071594790 | T | T | T |
| 0.3336300030000032 | 0.5249999790000004 | 0.1796899989999972 | F | F | F |
| 0.2643781067514547 | 0.7753671963574029 | 0.3505439486157546 | T | T | T |
| 0.5487945273881796 | 0.9169811958719816 | 0.2815148871708044 | T | T | T |
| 0.5499999999999972 | 0.1331900059999995 | 0.0905399970000005 | F | F | F |
| 0.0326420112663109 | 0.4118961639785695 | 0.2791459728731949 | T | T | T |
| 0.0499999999999972 | 0.6331899899999982 | 0.0905399970000005 | F | F | F |
| 0.7929552967633543 | 0.0459839690350530 | 0.3401291501683538 | T | T | T |
| 0.2825756211795792 | 0.9987039987462507 | 0.3533331022353616 | T | T | T |
| 0.2989653117595266 | 0.5433126449850200 | 0.3524281331377918 | T | T | T |
| 0.7887065146663905 | 0.4983686345510941 | 0.3683526014395436 | T | T | T |
| 0.7613146154317197 | 0.7803908485133465 | 0.3518938527562586 | T | T | T |
| 0.8336300499999965 | 0.5249999790000004 | 0.1796899989999972 | F | F | F |
| 0.2752221366495474 | 0.2627059332619644 | 0.3513092873260845 | T | T | T |
| 0.3336300030000032 | 0.0250000010000022 | 0.1796899989999972 | F | F | F |
| 0.0469930727891879 | 0.8804204024967461 | 0.2588085657403263 | T | T | T |
| 0.0499999999999972 | 0.1668099999999981 | 0.1116699999999966 | F | F | F |
| 0.5464344058612796 | 0.3831899028179984 | 0.2579919097232751 | T | T | T |
| 0.5499999999999972 | 0.6668099509999976 | 0.1116699999999966 | F | F | F |
| 0.5499999999999972 | 0.4000000200000002 | 0.1011099950000016 | F | F | F |
| 0.0471942457932920 | 0.1475859503496515 | 0.2713911287976278 | T | T | T |

|                    |                    |                    |   |   |   |
|--------------------|--------------------|--------------------|---|---|---|
| 0.549999999999972  | 0.8999999540000019 | 0.1011099950000016 | F | F | F |
| 0.0488643392784587 | 0.6459167072871798 | 0.2737182777437568 | T | T | T |
| 0.049999999999972  | 0.4000000200000002 | 0.1011099950000016 | F | F | F |
| 0.049999999999972  | 0.8999999540000019 | 0.1011099950000016 | F | F | F |
| 0.5492443521443204 | 0.6497810824523187 | 0.2661197244489165 | T | T | T |
| 0.5527424027367022 | 0.1497602039060689 | 0.2681146739041782 | T | T | T |
| 0.3623024245404669 | 0.5519399817740841 | 0.4832717650514059 | T | T | T |
| 0.4941139767811382 | 0.4342217632596560 | 0.4223313525434992 | T | T | T |
| 0.6837711843108728 | 0.5075369092608756 | 0.4825701809142839 | T | T | T |
| 0.5485164719854571 | 0.6229142506152763 | 0.4212159667507046 | T | T | T |
| 0.6133191447963587 | 0.7368961664282077 | 0.4718416509778564 | T | T | T |

PdPt3/In2O3

1.000000000000000

|                     |                     |                     |
|---------------------|---------------------|---------------------|
| 10.2175998688000007 | 0.0000000000000000  | 0.0000000000000000  |
| 0.0000000000000000  | 14.4497995377000006 | 0.0000000000000000  |
| 0.0000000000000000  | 0.0000000000000000  | 20.9857006073000001 |

|    |    |    |    |   |
|----|----|----|----|---|
| O  | In | Pd | Pt | C |
| 50 | 32 | 1  | 3  | 1 |

Selective dynamics

Direct

|                    |                    |                    |   |   |   |
|--------------------|--------------------|--------------------|---|---|---|
| 0.1819400070000015 | 0.5179200199999983 | 0.1152000000000015 | F | F | F |
| 0.6819400070000015 | 0.0179200010000002 | 0.1152000000000015 | F | F | F |
| 0.6797761470110046 | 0.0328084333482579 | 0.2511787019799954 | T | T | T |
| 0.1801715319451418 | 0.5177773667383931 | 0.2650679539301777 | T | T | T |
| 0.9101251654527758 | 0.3773506936558348 | 0.3584173520729337 | T | T | T |
| 0.4089817641113385 | 0.8828445160402438 | 0.3575664713103919 | T | T | T |
| 0.4252202248168970 | 0.6757716291709741 | 0.3488389045290674 | T | T | T |
| 0.9142571205317438 | 0.1639345493964512 | 0.3491547352637028 | T | T | T |
| 0.9545099699999966 | 0.3958000000000013 | 0.1866899999999987 | F | F | F |
| 0.4545100160000004 | 0.8957999670000021 | 0.1866899999999987 | F | F | F |
| 0.6431310281259357 | 0.7852082200380366 | 0.2647690422638505 | T | T | T |
| 0.1427236408881782 | 0.2857879113873949 | 0.2727344581546447 | T | T | T |
| 0.4545100160000004 | 0.1542000070000000 | 0.1726800109999971 | F | F | F |
| 0.9545099699999966 | 0.6542000230000014 | 0.1726800109999971 | F | F | F |
| 0.1454900069999994 | 0.7638599679999984 | 0.1037499959999977 | F | F | F |
| 0.6454899840000010 | 0.2638599839999998 | 0.1037499959999977 | F | F | F |
| 0.1903399939999986 | 0.2862900060000015 | 0.1125700079999987 | F | F | F |
| 0.6903399589999992 | 0.7862899730000024 | 0.1125700079999987 | F | F | F |
| 0.9096599470000015 | 0.8817800340000019 | 0.1725899979999994 | F | F | F |
| 0.4096599940000019 | 0.3817800010000028 | 0.1725899979999994 | F | F | F |
| 0.4096599940000019 | 0.6682199560000015 | 0.1867800019999990 | F | F | F |
| 0.9096599470000015 | 0.1682200059999985 | 0.1867800019999990 | F | F | F |

|                    |                    |                    |   |   |   |
|--------------------|--------------------|--------------------|---|---|---|
| 0.6892692903951598 | 0.2678980012611234 | 0.2533925669020718 | T | T | T |
| 0.1860441840844800 | 0.7610148889263542 | 0.2530755299295535 | T | T | T |
| 0.4180599930000000 | 0.7820899849999989 | 0.0870100030000032 | F | F | F |
| 0.9180600400000003 | 0.2820900179999981 | 0.0870100030000032 | F | F | F |
| 0.9164838735389722 | 0.7647887049519682 | 0.2868935652452649 | T | T | T |
| 0.4177975472461739 | 0.2658205608747366 | 0.2805358447559598 | T | T | T |
| 0.6819400070000015 | 0.4224300249999970 | 0.1752299990000026 | F | F | F |
| 0.1819400070000015 | 0.9224299589999987 | 0.1752299990000026 | F | F | F |
| 0.1819400070000015 | 0.1275800049999987 | 0.1841400010000029 | F | F | F |
| 0.6819400070000015 | 0.6275799969999980 | 0.1841400010000029 | F | F | F |
| 0.6323318220766154 | 0.3887753725514003 | 0.3534364848737042 | T | T | T |
| 0.1365377018053593 | 0.8965010639703479 | 0.3515630770238829 | T | T | T |
| 0.9572358704965964 | 0.0118108366598406 | 0.2699803422088536 | T | T | T |
| 0.4545269028107981 | 0.5147665397115802 | 0.2710169729460006 | T | T | T |
| 0.1532167579230759 | 0.6509511300811823 | 0.3652429636508572 | T | T | T |
| 0.6407377353198882 | 0.1509814898511266 | 0.3627435512347787 | T | T | T |
| 0.4545100160000004 | 0.5361400390000028 | 0.0984700050000029 | F | F | F |
| 0.9545099699999966 | 0.0361399980000030 | 0.0984700050000029 | F | F | F |
| 0.4096599940000019 | 0.0137100000000032 | 0.0896599969999983 | F | F | F |
| 0.9096599470000015 | 0.5137100339999989 | 0.0896599969999983 | F | F | F |
| 0.7093535462801484 | 0.9196173423323515 | 0.3586774985218710 | T | T | T |
| 0.3062398299338511 | 0.3927495558500596 | 0.3906658260978020 | T | T | T |
| 0.1995732870767171 | 0.1300199336307557 | 0.3564923597508525 | T | T | T |
| 0.6931820078752864 | 0.6341775038410304 | 0.3480004639065513 | T | T | T |
| 0.8998373593940627 | 0.5362965448821839 | 0.2826867429744624 | T | T | T |
| 0.4073255490718140 | 0.0384408170513382 | 0.2778179430991514 | T | T | T |
| 0.7179213331332122 | 0.7687358596225948 | 0.4536156539668994 | T | T | T |
| 0.5354135302030372 | 0.7539812698790342 | 0.5154940989133934 | T | T | T |
| 0.7999999999999972 | 0.7581899819999975 | 0.1902599909999978 | F | F | F |
| 0.3000000230000026 | 0.7918100090000024 | 0.1691199950000026 | F | F | F |
| 0.3000000230000026 | 0.2581899979999989 | 0.1902599909999978 | F | F | F |
| 0.7999999999999972 | 0.2918100090000024 | 0.1691199950000026 | F | F | F |
| 0.8336300499999965 | 0.0250000010000022 | 0.1796899989999972 | F | F | F |
| 0.7677334359946073 | 0.2672192439833907 | 0.3505465135954253 | T | T | T |
| 0.3336300030000032 | 0.5249999790000004 | 0.1796899989999972 | F | F | F |
| 0.2648408408908409 | 0.7754773178072654 | 0.3505657235878274 | T | T | T |
| 0.5490535442486930 | 0.9172143306513050 | 0.2814725857891531 | T | T | T |
| 0.5499999999999972 | 0.1331900059999995 | 0.0905399970000005 | F | F | F |
| 0.0324885455194988 | 0.4119073671173155 | 0.2792749893368125 | T | T | T |
| 0.0499999999999972 | 0.6331899899999982 | 0.0905399970000005 | F | F | F |
| 0.7925697646950383 | 0.0462936461270118 | 0.3401664029731748 | T | T | T |
| 0.2822901692845505 | 0.9987254518088804 | 0.3531615733640265 | T | T | T |
| 0.3017607840217877 | 0.5430706145750364 | 0.3510544671729576 | T | T | T |
| 0.7872448756698702 | 0.4978368319059712 | 0.3679465765701480 | T | T | T |

|                    |                    |                    |   |   |   |
|--------------------|--------------------|--------------------|---|---|---|
| 0.7603294221378718 | 0.7800352564423179 | 0.3521607405633489 | T | T | T |
| 0.8336300499999965 | 0.5249999790000004 | 0.1796899989999972 | F | F | F |
| 0.2745255482852613 | 0.2631525742077727 | 0.3517506732075475 | T | T | T |
| 0.3336300030000032 | 0.0250000010000022 | 0.1796899989999972 | F | F | F |
| 0.0465798643806963 | 0.8801768360962399 | 0.2590132190581471 | T | T | T |
| 0.0499999999999972 | 0.1668099999999981 | 0.1116699999999966 | F | F | F |
| 0.5471378972175103 | 0.3832346012955057 | 0.2577286845408366 | T | T | T |
| 0.5499999999999972 | 0.6668099509999976 | 0.1116699999999966 | F | F | F |
| 0.5499999999999972 | 0.4000000200000002 | 0.1011099950000016 | F | F | F |
| 0.0468270264992867 | 0.1476685222895071 | 0.2714849345120456 | T | T | T |
| 0.5499999999999972 | 0.8999999540000019 | 0.1011099950000016 | F | F | F |
| 0.0490724036106727 | 0.6458044164849142 | 0.2739938920777689 | T | T | T |
| 0.0499999999999972 | 0.4000000200000002 | 0.1011099950000016 | F | F | F |
| 0.0499999999999972 | 0.8999999540000019 | 0.1011099950000016 | F | F | F |
| 0.5499257961854482 | 0.6499009140514360 | 0.2658285222631491 | T | T | T |
| 0.5519826799029133 | 0.1500373768543852 | 0.2683803071440636 | T | T | T |
| 0.3592006048496188 | 0.5550003046874110 | 0.4850639999530202 | T | T | T |
| 0.4887531173922355 | 0.4350010135927036 | 0.4223654306818148 | T | T | T |
| 0.5468386843387520 | 0.6206894051722855 | 0.4204711755692614 | T | T | T |
| 0.6812930050207839 | 0.5057508885670003 | 0.4823288054758308 | T | T | T |
| 0.6077528970427153 | 0.7343165567018701 | 0.4711743801507140 | T | T | T |

### Pd2Pt2/In2O3

1.0000000000000000

|                     |                     |                     |
|---------------------|---------------------|---------------------|
| 10.2175998688000007 | 0.0000000000000000  | 0.0000000000000000  |
| 0.0000000000000000  | 14.4497995377000006 | 0.0000000000000000  |
| 0.0000000000000000  | 0.0000000000000000  | 20.9857006073000001 |

| O  | In | Pd | Pt | C |
|----|----|----|----|---|
| 50 | 32 | 2  | 2  | 1 |

### Selective dynamics

#### Direct

|                    |                    |                    |   |   |   |
|--------------------|--------------------|--------------------|---|---|---|
| 0.1819400070000015 | 0.5179200199999983 | 0.1152000000000015 | F | F | F |
| 0.6819400070000015 | 0.0179200010000002 | 0.1152000000000015 | F | F | F |
| 0.6795518418028000 | 0.0324002837743711 | 0.2512472560914356 | T | T | T |
| 0.1803441622171521 | 0.5184025759713751 | 0.2643459167291155 | T | T | T |
| 0.9132258782697065 | 0.3777145210404594 | 0.3585503069563649 | T | T | T |
| 0.4083762267621328 | 0.8829373973331244 | 0.3575575927033073 | T | T | T |
| 0.4254306045042985 | 0.6752737877455384 | 0.3488195095877480 | T | T | T |
| 0.9146040024879000 | 0.1641455435378785 | 0.3489677470268210 | T | T | T |
| 0.9545099699999966 | 0.3958000000000013 | 0.1866899999999987 | F | F | F |
| 0.4545100160000004 | 0.8957999670000021 | 0.1866899999999987 | F | F | F |
| 0.6426901572405407 | 0.7851970886339684 | 0.2646866176555515 | T | T | T |
| 0.1426306402665413 | 0.2859903850191282 | 0.2718109233898209 | T | T | T |



|                    |                    |                    |   |   |   |
|--------------------|--------------------|--------------------|---|---|---|
| 0.4545100160000004 | 0.1542000070000000 | 0.1726800109999971 | F | F | F |
| 0.9545099699999966 | 0.6542000230000014 | 0.1726800109999971 | F | F | F |
| 0.1454900069999994 | 0.7638599679999984 | 0.1037499959999977 | F | F | F |
| 0.6454899840000010 | 0.2638599839999998 | 0.1037499959999977 | F | F | F |
| 0.1903399939999986 | 0.2862900060000015 | 0.1125700079999987 | F | F | F |
| 0.6903399589999992 | 0.7862899730000024 | 0.1125700079999987 | F | F | F |
| 0.9096599470000015 | 0.8817800340000019 | 0.1725899979999994 | F | F | F |
| 0.4096599940000019 | 0.3817800010000028 | 0.1725899979999994 | F | F | F |
| 0.4096599940000019 | 0.6682199560000015 | 0.1867800019999990 | F | F | F |
| 0.9096599470000015 | 0.1682200059999985 | 0.1867800019999990 | F | F | F |
| 0.6888839674249376 | 0.2668375152904021 | 0.2527249201996447 | T | T | T |
| 0.1860243862009200 | 0.7611879425635460 | 0.2531603061670128 | T | T | T |
| 0.4180599930000000 | 0.7820899849999989 | 0.0870100030000032 | F | F | F |
| 0.9180600400000003 | 0.2820900179999981 | 0.0870100030000032 | F | F | F |
| 0.9162294735967268 | 0.7649193597006695 | 0.2869192026895097 | T | T | T |
| 0.4173353943556399 | 0.2657666351937661 | 0.2807463544600413 | T | T | T |
| 0.6819400070000015 | 0.4224300249999970 | 0.1752299990000026 | F | F | F |
| 0.1819400070000015 | 0.9224299589999987 | 0.1752299990000026 | F | F | F |
| 0.1819400070000015 | 0.1275800049999987 | 0.1841400010000029 | F | F | F |
| 0.6819400070000015 | 0.6275799969999980 | 0.1841400010000029 | F | F | F |
| 0.6361097507609598 | 0.3895585394400305 | 0.3518263133446314 | T | T | T |
| 0.1362720746791438 | 0.8965361188742134 | 0.3517120584277911 | T | T | T |
| 0.9572907698006012 | 0.0117644652977046 | 0.2699959323868136 | T | T | T |
| 0.4545363039902556 | 0.5145773694272420 | 0.2712942677465621 | T | T | T |
| 0.1533245220328087 | 0.6507278305116996 | 0.3651163586859792 | T | T | T |
| 0.6416800752041585 | 0.1515309109359603 | 0.3625807673470417 | T | T | T |
| 0.4545100160000004 | 0.5361400390000028 | 0.0984700050000029 | F | F | F |
| 0.9545099699999966 | 0.0361399980000030 | 0.0984700050000029 | F | F | F |
| 0.4096599940000019 | 0.0137100000000032 | 0.0896599969999983 | F | F | F |
| 0.9096599470000015 | 0.5137100339999989 | 0.0896599969999983 | F | F | F |
| 0.7095035294771759 | 0.9195079267086949 | 0.3589638171506690 | T | T | T |
| 0.3032774999212812 | 0.3944232731002417 | 0.3904837208621464 | T | T | T |
| 0.1999720525025430 | 0.1309144010465751 | 0.3559252700336442 | T | T | T |
| 0.6935586443592179 | 0.6341905389905498 | 0.3482243280281736 | T | T | T |
| 0.8998644814500536 | 0.5367248696753730 | 0.2825795175182877 | T | T | T |
| 0.4072579488397942 | 0.0382695290561251 | 0.2777700488313652 | T | T | T |
| 0.7144888982743347 | 0.7678478055124428 | 0.4538549111249251 | T | T | T |
| 0.5338522935820083 | 0.7485170548726601 | 0.5165916102356233 | T | T | T |
| 0.7999999999999972 | 0.7581899819999975 | 0.1902599909999978 | F | F | F |
| 0.3000000230000026 | 0.7918100090000024 | 0.1691199950000026 | F | F | F |
| 0.3000000230000026 | 0.2581899979999989 | 0.1902599909999978 | F | F | F |
| 0.7999999999999972 | 0.2918100090000024 | 0.1691199950000026 | F | F | F |
| 0.8336300499999965 | 0.0250000010000022 | 0.1796899989999972 | F | F | F |
| 0.7690595544562482 | 0.2681425666436391 | 0.3496120810911489 | T | T | T |

|                    |                    |                    |   |   |   |
|--------------------|--------------------|--------------------|---|---|---|
| 0.3336300030000032 | 0.5249999790000004 | 0.1796899989999972 | F | F | F |
| 0.2649783310699018 | 0.7751874639616053 | 0.3506961782232683 | T | T | T |
| 0.5487275012457369 | 0.9172021808189481 | 0.2816038418413744 | T | T | T |
| 0.5499999999999972 | 0.1331900059999995 | 0.0905399970000005 | F | F | F |
| 0.0334374143208143 | 0.4125025997268945 | 0.2790521684553606 | T | T | T |
| 0.0499999999999972 | 0.6331899899999982 | 0.0905399970000005 | F | F | F |
| 0.7926232808207277 | 0.0464430000140285 | 0.3401544232295587 | T | T | T |
| 0.2816225783224702 | 0.9991322973107448 | 0.3529913965704283 | T | T | T |
| 0.3007852802996548 | 0.5416604356785698 | 0.3510573100652206 | T | T | T |
| 0.7874055408097600 | 0.4971859363643076 | 0.3677955082109590 | T | T | T |
| 0.7593035330296202 | 0.7798630759644907 | 0.3520326517726821 | T | T | T |
| 0.8336300499999965 | 0.5249999790000004 | 0.1796899989999972 | F | F | F |
| 0.2722820694091386 | 0.2653411580913252 | 0.3516844988792435 | T | T | T |
| 0.3336300030000032 | 0.0250000010000022 | 0.1796899989999972 | F | F | F |
| 0.0464462451929605 | 0.8801627485166238 | 0.2591616548330321 | T | T | T |
| 0.0499999999999972 | 0.1668099999999981 | 0.1116699999999966 | F | F | F |
| 0.5473652046364630 | 0.3829414779414153 | 0.2579393046103035 | T | T | T |
| 0.5499999999999972 | 0.6668099509999976 | 0.1116699999999966 | F | F | F |
| 0.5499999999999972 | 0.4000000200000002 | 0.1011099950000016 | F | F | F |
| 0.0473539663105098 | 0.1476388719484634 | 0.2714469870958786 | T | T | T |
| 0.5499999999999972 | 0.8999999540000019 | 0.1011099950000016 | F | F | F |
| 0.0488895977887409 | 0.6458583117335948 | 0.2740208001565571 | T | T | T |
| 0.0499999999999972 | 0.4000000200000002 | 0.1011099950000016 | F | F | F |
| 0.0499999999999972 | 0.8999999540000019 | 0.1011099950000016 | F | F | F |
| 0.5498577496585870 | 0.6496231416413702 | 0.2658113204580989 | T | T | T |
| 0.5516364000264043 | 0.1499605414617418 | 0.2686264596905647 | T | T | T |
| 0.3585858181392738 | 0.5525070816491923 | 0.4835032204441607 | T | T | T |
| 0.4905966785962588 | 0.4314897509913349 | 0.4229207192513647 | T | T | T |
| 0.5464467272323479 | 0.6186856767497094 | 0.4198271345082780 | T | T | T |
| 0.6818162794079407 | 0.5055764950962315 | 0.4825994078815870 | T | T | T |
| 0.6065221298162894 | 0.7314877843245773 | 0.4719430066441556 | T | T | T |

### Pd3Pt/In2O3

1.0000000000000000

|                     |                     |                     |
|---------------------|---------------------|---------------------|
| 10.2175998688000007 | 0.0000000000000000  | 0.0000000000000000  |
| 0.0000000000000000  | 14.4497995377000006 | 0.0000000000000000  |
| 0.0000000000000000  | 0.0000000000000000  | 20.9857006073000001 |

| O  | In | Pd | Pt | C |
|----|----|----|----|---|
| 50 | 32 | 3  | 1  | 1 |

### Selective dynamics

#### Direct

|                    |                    |                    |   |   |   |
|--------------------|--------------------|--------------------|---|---|---|
| 0.1819400070000015 | 0.5179200199999983 | 0.1152000000000015 | F | F | F |
| 0.6819400070000015 | 0.0179200010000002 | 0.1152000000000015 | F | F | F |

|                    |                    |                    |   |   |   |
|--------------------|--------------------|--------------------|---|---|---|
| 0.6793677190463588 | 0.0318595991552185 | 0.2516250850322085 | T | T | T |
| 0.1809024531410271 | 0.5185578644826098 | 0.2644273832011579 | T | T | T |
| 0.9124820879691082 | 0.3782565276111926 | 0.3584279652209121 | T | T | T |
| 0.4089782811883769 | 0.8834912083408858 | 0.3583651649658777 | T | T | T |
| 0.4237113422739276 | 0.6757620072174181 | 0.3484471421287575 | T | T | T |
| 0.9145424800032019 | 0.1641887064203758 | 0.3489865310769501 | T | T | T |
| 0.9545099699999966 | 0.3958000000000013 | 0.1866899999999987 | F | F | F |
| 0.4545100160000004 | 0.8957999670000021 | 0.1866899999999987 | F | F | F |
| 0.6426079187475220 | 0.7857381847725933 | 0.2644980789610443 | T | T | T |
| 0.1427609177370944 | 0.2861572956238280 | 0.2719693748812629 | T | T | T |
| 0.4545100160000004 | 0.1542000070000000 | 0.1726800109999971 | F | F | F |
| 0.9545099699999966 | 0.6542000230000014 | 0.1726800109999971 | F | F | F |
| 0.1454900069999994 | 0.7638599679999984 | 0.1037499959999977 | F | F | F |
| 0.6454899840000010 | 0.2638599839999998 | 0.1037499959999977 | F | F | F |
| 0.1903399939999986 | 0.2862900060000015 | 0.1125700079999987 | F | F | F |
| 0.6903399589999992 | 0.7862899730000024 | 0.1125700079999987 | F | F | F |
| 0.9096599470000015 | 0.8817800340000019 | 0.1725899979999994 | F | F | F |
| 0.4096599940000019 | 0.3817800010000028 | 0.1725899979999994 | F | F | F |
| 0.4096599940000019 | 0.6682199560000015 | 0.1867800019999990 | F | F | F |
| 0.9096599470000015 | 0.1682200059999985 | 0.1867800019999990 | F | F | F |
| 0.6889426894070717 | 0.2669037740987827 | 0.2528100579765868 | T | T | T |
| 0.1860528002277303 | 0.7613757267847299 | 0.2529990380333552 | T | T | T |
| 0.4180599930000000 | 0.7820899849999989 | 0.0870100030000032 | F | F | F |
| 0.9180600400000003 | 0.2820900179999981 | 0.0870100030000032 | F | F | F |
| 0.9171099346284766 | 0.7653447929910197 | 0.2863636448212892 | T | T | T |
| 0.4175604453991553 | 0.2658968435819392 | 0.2807830235357323 | T | T | T |
| 0.6819400070000015 | 0.4224300249999970 | 0.1752299990000026 | F | F | F |
| 0.1819400070000015 | 0.9224299589999987 | 0.1752299990000026 | F | F | F |
| 0.1819400070000015 | 0.1275800049999987 | 0.1841400010000029 | F | F | F |
| 0.6819400070000015 | 0.6275799969999980 | 0.1841400010000029 | F | F | F |
| 0.6360472575557485 | 0.3901132610108222 | 0.3520414926169514 | T | T | T |
| 0.1368905740924315 | 0.8968234775403848 | 0.3515030701429809 | T | T | T |
| 0.9571225995778110 | 0.0119953284908800 | 0.2700346781765611 | T | T | T |
| 0.4551323733505365 | 0.5146694434990169 | 0.2712952400159171 | T | T | T |
| 0.1521898413803816 | 0.6511044132367704 | 0.3652280764603597 | T | T | T |
| 0.6418817662583203 | 0.1513739367135686 | 0.3625994223883021 | T | T | T |
| 0.4545100160000004 | 0.5361400390000028 | 0.0984700050000029 | F | F | F |
| 0.9545099699999966 | 0.0361399980000030 | 0.0984700050000029 | F | F | F |
| 0.4096599940000019 | 0.0137100000000032 | 0.0896599969999983 | F | F | F |
| 0.9096599470000015 | 0.5137100339999989 | 0.0896599969999983 | F | F | F |
| 0.7104405744223610 | 0.9186764526560549 | 0.3602278430074394 | T | T | T |
| 0.3049349155576695 | 0.3948793359048493 | 0.3905615769812379 | T | T | T |
| 0.2003635559239059 | 0.1313354028918461 | 0.3562619228257177 | T | T | T |
| 0.6954543618212530 | 0.6357960458929114 | 0.3479168411891750 | T | T | T |

|                    |                     |                    |   |   |   |
|--------------------|---------------------|--------------------|---|---|---|
| 0.9001898736206592 | 0.5366526107559900  | 0.2823189680469496 | T | T | T |
| 0.4070236073326594 | 0.0382657771617322  | 0.2778517072422928 | T | T | T |
| 0.5379464730650003 | 0.7461818602641488  | 0.5186978982548954 | T | T | T |
| 0.7214180675387563 | 0.7652841718201482  | 0.4561277935388600 | T | T | T |
| 0.7999999999999972 | 0.7581899819999975  | 0.1902599909999978 | F | F | F |
| 0.3000000230000026 | 0.7918100090000024  | 0.1691199950000026 | F | F | F |
| 0.3000000230000026 | 0.2581899979999989  | 0.1902599909999978 | F | F | F |
| 0.7999999999999972 | 0.2918100090000024  | 0.1691199950000026 | F | F | F |
| 0.8336300499999965 | 0.0250000010000022  | 0.1796899989999972 | F | F | F |
| 0.7691668677801438 | 0.2683749690303641  | 0.3496578361721141 | T | T | T |
| 0.3336300030000032 | 0.5249999790000004  | 0.1796899989999972 | F | F | F |
| 0.2649848835951180 | 0.7753486574406239  | 0.3503695881586726 | T | T | T |
| 0.5481583990767720 | 0.9172057126542895  | 0.2818071247147541 | T | T | T |
| 0.5499999999999972 | 0.1331900059999995  | 0.0905399970000005 | F | F | F |
| 0.0335159847924773 | 0.4127376206726284  | 0.2790554910527727 | T | T | T |
| 0.0499999999999972 | 0.6331899899999982  | 0.0905399970000005 | F | F | F |
| 0.7926815654715524 | 0.0462837810258538  | 0.3402462627140513 | T | T | T |
| 0.2818363580692169 | -0.0004522891369554 | 0.3533548481602024 | T | T | T |
| 0.3021414609524999 | 0.5428438364813327  | 0.3509287913165543 | T | T | T |
| 0.7873291498628062 | 0.4985384540284150  | 0.3676719442056451 | T | T | T |
| 0.7606708947485683 | 0.7797980217870386  | 0.3510967401800147 | T | T | T |
| 0.8336300499999965 | 0.5249999790000004  | 0.1796899989999972 | F | F | F |
| 0.2730624684532605 | 0.2658603184235008  | 0.3518350240880758 | T | T | T |
| 0.3336300030000032 | 0.0250000010000022  | 0.1796899989999972 | F | F | F |
| 0.0470959285493646 | 0.8806867691356617  | 0.2588368711108786 | T | T | T |
| 0.0499999999999972 | 0.1668099999999981  | 0.1116699999999966 | F | F | F |
| 0.5475077131580164 | 0.3830743023748491  | 0.2579180584204117 | T | T | T |
| 0.5499999999999972 | 0.6668099509999976  | 0.1116699999999966 | F | F | F |
| 0.5499999999999972 | 0.4000000200000002  | 0.1011099950000016 | F | F | F |
| 0.0474422116056642 | 0.1479523887110801  | 0.2715432832887693 | T | T | T |
| 0.5499999999999972 | 0.8999999540000019  | 0.1011099950000016 | F | F | F |
| 0.0492868468245386 | 0.6458991563905102  | 0.2739045911883662 | T | T | T |
| 0.0499999999999972 | 0.4000000200000002  | 0.1011099950000016 | F | F | F |
| 0.0499999999999972 | 0.8999999540000019  | 0.1011099950000016 | F | F | F |
| 0.5497268017325165 | 0.6499585186976129  | 0.2663666937251125 | T | T | T |
| 0.5516085962776818 | 0.1500064330502526  | 0.2686496872692812 | T | T | T |
| 0.3598161433820093 | 0.5535450880214012  | 0.4822883101072009 | T | T | T |
| 0.4917951117041703 | 0.4328333352678273  | 0.4223591072826764 | T | T | T |
| 0.5480195167345500 | 0.6229027835075042  | 0.4198683474742506 | T | T | T |
| 0.6813707086714607 | 0.5077342521963816  | 0.4821623614071284 | T | T | T |
| 0.6141021155616925 | 0.7327979887104942  | 0.4753550835243739 | T | T | T |

1.0000000000000000  
 10.2175998688000007 0.0000000000000000 0.0000000000000000  
 0.0000000000000000 14.4497995377000006 0.0000000000000000  
 0.0000000000000000 0.0000000000000000 20.9857006073000001

O In Pd C  
 50 32 4 1

Selective dynamics

Direct

|                    |                    |                    |   |   |   |
|--------------------|--------------------|--------------------|---|---|---|
| 0.1819400070000015 | 0.5179200199999983 | 0.1152000000000015 | F | F | F |
| 0.6819400070000015 | 0.0179200010000002 | 0.1152000000000015 | F | F | F |
| 0.6795335676902915 | 0.0317917441707744 | 0.2516551713510481 | T | T | T |
| 0.1806792823848432 | 0.5183772630473064 | 0.2644218125237449 | T | T | T |
| 0.9116970867977809 | 0.3786606660695459 | 0.3590858618601828 | T | T | T |
| 0.4090427840425114 | 0.8836068807012981 | 0.3583095509677714 | T | T | T |
| 0.4234352935785431 | 0.6757415084947483 | 0.3482553698013556 | T | T | T |
| 0.9148188928727016 | 0.1639643714461942 | 0.3489916193297786 | T | T | T |
| 0.9545099699999966 | 0.3958000000000013 | 0.1866899999999987 | F | F | F |
| 0.4545100160000004 | 0.8957999670000021 | 0.1866899999999987 | F | F | F |
| 0.6427609372528904 | 0.7858381711553357 | 0.2644987766738416 | T | T | T |
| 0.1424406776478226 | 0.2863812984435769 | 0.2721097499137226 | T | T | T |
| 0.4545100160000004 | 0.1542000070000000 | 0.1726800109999971 | F | F | F |
| 0.9545099699999966 | 0.6542000230000014 | 0.1726800109999971 | F | F | F |
| 0.1454900069999994 | 0.7638599679999984 | 0.1037499959999977 | F | F | F |
| 0.6454899840000010 | 0.2638599839999998 | 0.1037499959999977 | F | F | F |
| 0.1903399939999986 | 0.2862900060000015 | 0.1125700079999987 | F | F | F |
| 0.6903399589999992 | 0.7862899730000024 | 0.1125700079999987 | F | F | F |
| 0.9096599470000015 | 0.8817800340000019 | 0.1725899979999994 | F | F | F |
| 0.4096599940000019 | 0.3817800010000028 | 0.1725899979999994 | F | F | F |
| 0.4096599940000019 | 0.6682199560000015 | 0.1867800019999990 | F | F | F |
| 0.9096599470000015 | 0.1682200059999985 | 0.1867800019999990 | F | F | F |
| 0.6889829688145211 | 0.2668826293713527 | 0.2528676075464436 | T | T | T |
| 0.1858673231574846 | 0.7613392701389284 | 0.2528180975407402 | T | T | T |
| 0.4180599930000000 | 0.7820899849999989 | 0.0870100030000032 | F | F | F |
| 0.9180600400000003 | 0.2820900179999981 | 0.0870100030000032 | F | F | F |
| 0.9170163538716711 | 0.7653190319957686 | 0.2862068004139039 | T | T | T |
| 0.4174231061635350 | 0.2658862399286659 | 0.2807963337116017 | T | T | T |
| 0.6819400070000015 | 0.4224300249999970 | 0.1752299990000026 | F | F | F |
| 0.1819400070000015 | 0.9224299589999987 | 0.1752299990000026 | F | F | F |
| 0.1819400070000015 | 0.1275800049999987 | 0.1841400010000029 | F | F | F |
| 0.6819400070000015 | 0.6275799969999980 | 0.1841400010000029 | F | F | F |
| 0.6360604629833071 | 0.3895669026231421 | 0.3521155548686958 | T | T | T |
| 0.1370553988797484 | 0.8967471453851508 | 0.3514674819313915 | T | T | T |
| 0.9571127464537138 | 0.0119259194591623 | 0.2700293924244230 | T | T | T |
| 0.4553216735957368 | 0.5144839852878663 | 0.2712236095088602 | T | T | T |

|                    |                    |                    |   |   |   |
|--------------------|--------------------|--------------------|---|---|---|
| 0.1516675492883297 | 0.6510776075624768 | 0.3650585244251247 | T | T | T |
| 0.6420736461943753 | 0.1512146487599682 | 0.3626380781351543 | T | T | T |
| 0.4545100160000004 | 0.5361400390000028 | 0.0984700050000029 | F | F | F |
| 0.9545099699999966 | 0.0361399980000030 | 0.0984700050000029 | F | F | F |
| 0.4096599940000019 | 0.0137100000000032 | 0.0896599969999983 | F | F | F |
| 0.9096599470000015 | 0.5137100339999989 | 0.0896599969999983 | F | F | F |
| 0.7101075320658182 | 0.9186973321444336 | 0.3604952026207183 | T | T | T |
| 0.3060683436823005 | 0.3949568780193204 | 0.3912138576737897 | T | T | T |
| 0.2004888514918241 | 0.1314452575969385 | 0.3561062332852238 | T | T | T |
| 0.6956383688482712 | 0.6357860646825747 | 0.3474302817711215 | T | T | T |
| 0.8996862031480937 | 0.5363734567117244 | 0.2822619350485290 | T | T | T |
| 0.4070690812624118 | 0.0383603091757896 | 0.2777794281262430 | T | T | T |
| 0.7282856486768579 | 0.7624030761929743 | 0.4559006808607594 | T | T | T |
| 0.5548427616310927 | 0.7360996370277839 | 0.5234437918674687 | T | T | T |
| 0.799999999999972  | 0.7581899819999975 | 0.1902599909999978 | F | F | F |
| 0.3000000230000026 | 0.7918100090000024 | 0.1691199950000026 | F | F | F |
| 0.3000000230000026 | 0.2581899979999989 | 0.1902599909999978 | F | F | F |
| 0.799999999999972  | 0.2918100090000024 | 0.1691199950000026 | F | F | F |
| 0.8336300499999965 | 0.0250000010000022 | 0.1796899989999972 | F | F | F |
| 0.7694392694067030 | 0.2681643042891715 | 0.3496862931526532 | T | T | T |
| 0.3336300030000032 | 0.5249999790000004 | 0.1796899989999972 | F | F | F |
| 0.2652278545073987 | 0.7751841669935782 | 0.3500503018700377 | T | T | T |
| 0.5481652705276217 | 0.9171854554058231 | 0.2818604118955190 | T | T | T |
| 0.549999999999972  | 0.1331900059999995 | 0.0905399970000005 | F | F | F |
| 0.0328391423641434 | 0.4128121497746493 | 0.2792946007846946 | T | T | T |
| 0.049999999999972  | 0.6331899899999982 | 0.0905399970000005 | F | F | F |
| 0.7926628495358737 | 0.0459633166770686 | 0.3403059567357500 | T | T | T |
| 0.2818908600114715 | 0.9995283672663324 | 0.3533146262189676 | T | T | T |
| 0.3020988353707398 | 0.5431823526432660 | 0.3507981681732663 | T | T | T |
| 0.7854217746647169 | 0.4989427295547466 | 0.3677860196472180 | T | T | T |
| 0.7609166389750954 | 0.7798564527218558 | 0.3511127443512069 | T | T | T |
| 0.8336300499999965 | 0.5249999790000004 | 0.1796899989999972 | F | F | F |
| 0.2728583312801173 | 0.2662260848138417 | 0.3519651799169859 | T | T | T |
| 0.3336300030000032 | 0.0250000010000022 | 0.1796899989999972 | F | F | F |
| 0.0471142254367689 | 0.8805748591467534 | 0.2588503824440302 | T | T | T |
| 0.049999999999972  | 0.1668099999999981 | 0.1116699999999966 | F | F | F |
| 0.5473513337433520 | 0.3829413477244467 | 0.2577609041386983 | T | T | T |
| 0.549999999999972  | 0.6668099509999976 | 0.1116699999999966 | F | F | F |
| 0.549999999999972  | 0.4000000200000002 | 0.1011099950000016 | F | F | F |
| 0.0476877041265729 | 0.1478528023768778 | 0.2715548718875954 | T | T | T |
| 0.549999999999972  | 0.8999999540000019 | 0.1011099950000016 | F | F | F |
| 0.0489912067448717 | 0.6457574936484551 | 0.2739032784359595 | T | T | T |
| 0.049999999999972  | 0.4000000200000002 | 0.1011099950000016 | F | F | F |
| 0.049999999999972  | 0.8999999540000019 | 0.1011099950000016 | F | F | F |

|                    |                    |                    |   |   |   |
|--------------------|--------------------|--------------------|---|---|---|
| 0.5493784402624030 | 0.6501340031841222 | 0.2663368695878040 | T | T | T |
| 0.5516152016005992 | 0.1499552720736156 | 0.2687115841711179 | T | T | T |
| 0.3596494659802855 | 0.5532187420703197 | 0.4815711642909937 | T | T | T |
| 0.4941259081872543 | 0.4344436368811784 | 0.4213776541713983 | T | T | T |
| 0.6838472516813596 | 0.5071257466328462 | 0.4842395541100109 | T | T | T |
| 0.5503093544720559 | 0.6218004362689319 | 0.4200331969849447 | T | T | T |
| 0.6244160385139175 | 0.7263552259279249 | 0.4769696585357660 | T | T | T |

## CO<sub>2</sub> dissociation transition states on Pd<sub>n</sub>Pt(4-n)/In<sub>2</sub>O<sub>3</sub>

Pd<sub>2</sub>Pt<sub>2</sub>/In<sub>2</sub>O<sub>3</sub>

1.0000000000000000  
10.2175998688000007 0.0000000000000000 0.0000000000000000  
0.0000000000000000 14.4497995377000006 0.0000000000000000  
0.0000000000000000 0.0000000000000000 20.9857006073000001

O In Pd Pt C  
50 32 2 2 1

Selective dynamics

Direct

|                    |                    |                    |   |   |   |
|--------------------|--------------------|--------------------|---|---|---|
| 0.1819400070000015 | 0.5179200199999985 | 0.1152000000000015 | F | F | F |
| 0.6819400070000015 | 0.0179200010000003 | 0.1152000000000015 | F | F | F |
| 0.6797144446296800 | 0.0282397213738402 | 0.2539902736326777 | F | F | F |
| 0.1808263503529819 | 0.5179045771426835 | 0.2630751536376932 | F | F | F |
| 0.9197215014045517 | 0.3771680785080812 | 0.3596455055173240 | F | F | F |
| 0.4091997692147882 | 0.8833640543960446 | 0.3580722797775387 | F | F | F |
| 0.4267277314945125 | 0.6750872302868339 | 0.3496491504940610 | F | F | F |
| 0.9174310872411100 | 0.1628369616506604 | 0.3496361336342715 | F | F | F |
| 0.9545099699999966 | 0.3958000000000880 | 0.1866899999999987 | F | F | F |
| 0.4545100160000004 | 0.8957999670001882 | 0.1866899999999987 | F | F | F |
| 0.6419903506687300 | 0.7865246580453913 | 0.2642784756085626 | F | F | F |
| 0.1448009161037753 | 0.2860665996648728 | 0.2723790642615227 | F | F | F |
| 0.4545100160000004 | 0.1542000070000000 | 0.1726800109999971 | F | F | F |
| 0.9545099699999966 | 0.6542000230000017 | 0.1726800109999971 | F | F | F |
| 0.1454900069999994 | 0.7638599680001649 | 0.1037499959999977 | F | F | F |
| 0.6454899840000010 | 0.2638599840000011 | 0.1037499959999977 | F | F | F |
| 0.1903399939999985 | 0.2862900060000015 | 0.1125700079999987 | F | F | F |
| 0.6903399589999992 | 0.7862899730001688 | 0.1125700079999987 | F | F | F |
| 0.9096599470000013 | 0.8817800340001873 | 0.1725899979999994 | F | F | F |
| 0.4096599940000019 | 0.3817800010000895 | 0.1725899979999994 | F | F | F |
| 0.4096599940000019 | 0.6682199560000017 | 0.1867800019999990 | F | F | F |
| 0.9096599470000013 | 0.1682200059999988 | 0.1867800019999990 | F | F | F |
| 0.6897363071797936 | 0.2647491299287696 | 0.2528880001883563 | F | F | F |
| 0.1872818863791097 | 0.7616219594534800 | 0.2532182175863960 | F | F | F |
| 0.4180599929999999 | 0.7820899850001652 | 0.0870100030000032 | F | F | F |
| 0.9180600400000002 | 0.2820900179999983 | 0.0870100030000032 | F | F | F |
| 0.9174638250221685 | 0.7654090504095706 | 0.2856321975974095 | F | F | F |
| 0.4182217468223877 | 0.2670659852699725 | 0.2829717837451884 | F | F | F |
| 0.6819400070000015 | 0.4224300250000848 | 0.1752299990000026 | F | F | F |
| 0.1819400070000015 | 0.9224299590001848 | 0.1752299990000026 | F | F | F |
| 0.1819400070000015 | 0.1275800049999987 | 0.1841400010000029 | F | F | F |
| 0.6819400070000015 | 0.6275799969999982 | 0.1841400010000029 | F | F | F |



|                    |                     |                    |   |   |   |
|--------------------|---------------------|--------------------|---|---|---|
| 0.6490350117216319 | 0.3924538311671810  | 0.3477789727050045 | F | F | F |
| 0.1368658764002675 | 0.8966410635045490  | 0.3516673128802681 | F | F | F |
| 0.9564859347688802 | 0.0114015036669086  | 0.2706338377087313 | F | F | F |
| 0.4566120780556526 | 0.5147707253213141  | 0.2717077966091584 | F | F | F |
| 0.1539564148503793 | 0.6509129575938242  | 0.3637205273345657 | F | F | F |
| 0.6449427783346177 | 0.1505963261135078  | 0.3629917344949533 | F | F | F |
| 0.4545100160000004 | 0.5361400390000048  | 0.0984700050000029 | F | F | F |
| 0.9545099699999966 | 0.0361399980000030  | 0.0984700050000029 | F | F | F |
| 0.4096599940000019 | 0.0137100000000040  | 0.0896599969999983 | F | F | F |
| 0.9096599470000013 | 0.5137100339999991  | 0.0896599969999983 | F | F | F |
| 0.7130424263593530 | 0.9170180944388726  | 0.3675910670761272 | F | F | F |
| 0.3071766731666210 | 0.3940066822090023  | 0.3962316374395867 | F | F | F |
| 0.2000841351324248 | 0.1310101849145499  | 0.3571376223973998 | F | F | F |
| 0.6911459421844089 | 0.6437391357136968  | 0.3578817522151078 | F | F | F |
| 0.8987826000295253 | 0.5384922589735117  | 0.2832438750290637 | F | F | F |
| 0.4063439187341527 | 0.0388322199161758  | 0.2781640564986392 | F | F | F |
| 0.6243526171643664 | 0.6583948546535552  | 0.5676603762673675 | T | T | T |
| 0.4190164738606999 | 0.6179827211948004  | 0.5018256109070255 | T | T | T |
| 0.799999999999972  | 0.7581899820001639  | 0.1902599909999978 | F | F | F |
| 0.3000000230000026 | 0.7918100090001688  | 0.1691199950000026 | F | F | F |
| 0.3000000230000026 | 0.2581899979999991  | 0.1902599909999978 | F | F | F |
| 0.799999999999972  | 0.2918100090000028  | 0.1691199950000026 | F | F | F |
| 0.8336300499999965 | 0.0250000010000107  | 0.1796899989999972 | F | F | F |
| 0.7738819567872911 | 0.2673957395298164  | 0.3495291520634461 | F | F | F |
| 0.3336300030000032 | 0.5249999790000024  | 0.1796899989999972 | F | F | F |
| 0.2648263504588570 | 0.7756724984468788  | 0.3505557894839516 | F | F | F |
| 0.5446671071309510 | 0.9172590352630425  | 0.2811167077574487 | F | F | F |
| 0.549999999999972  | 0.1331900059999997  | 0.0905399970000005 | F | F | F |
| 0.0338512024200501 | 0.4120738173086115  | 0.2785990590438792 | F | F | F |
| 0.049999999999972  | 0.6331899899999991  | 0.0905399970000005 | F | F | F |
| 0.7947647610634972 | 0.0446969109258581  | 0.3416807963985304 | F | F | F |
| 0.2813865969755767 | -0.0003266126461643 | 0.3538407192692112 | F | F | F |
| 0.3040474795689352 | 0.5449802850150255  | 0.3465967462951504 | F | F | F |
| 0.7968063435530520 | 0.4996734553533432  | 0.3699177304635563 | F | F | F |
| 0.7607438652690912 | 0.7827407912861895  | 0.3488433508307229 | F | F | F |
| 0.8336300499999965 | 0.5249999790000024  | 0.1796899989999972 | F | F | F |
| 0.2714589312493959 | 0.2658868307735356  | 0.3534479087819954 | F | F | F |
| 0.3336300030000032 | 0.0250000010000107  | 0.1796899989999972 | F | F | F |
| 0.0487863127619821 | 0.8811810490748979  | 0.2581188959078636 | F | F | F |
| 0.049999999999972  | 0.1668099999999982  | 0.1116699999999966 | F | F | F |
| 0.5494558725093482 | 0.3820153377557983  | 0.2566726114126643 | F | F | F |
| 0.549999999999972  | 0.6668099509999977  | 0.1116699999999966 | F | F | F |
| 0.549999999999972  | 0.4000000200000870  | 0.1011099950000016 | F | F | F |
| 0.0481369300645224 | 0.1475062922783915  | 0.2712801045279670 | F | F | F |

|                    |                    |                    |   |   |   |
|--------------------|--------------------|--------------------|---|---|---|
| 0.549999999999972  | 0.8999999540001878 | 0.1011099950000016 | F | F | F |
| 0.0502257922260456 | 0.6463420161018723 | 0.2726038334552804 | F | F | F |
| 0.049999999999972  | 0.4000000200000870 | 0.1011099950000016 | F | F | F |
| 0.049999999999972  | 0.8999999540001878 | 0.1011099950000016 | F | F | F |
| 0.5492771546613234 | 0.6507933726390692 | 0.2659644062009496 | F | F | F |
| 0.5521514187550481 | 0.1495306632649821 | 0.2694968730903901 | F | F | F |
| 0.3252023283034760 | 0.5048062064473184 | 0.4703544979703678 | F | F | F |
| 0.5089138332823495 | 0.4295700503170740 | 0.4160596531492343 | F | F | F |
| 0.5473127273722265 | 0.6405846303544378 | 0.4274247227518099 | F | F | F |
| 0.6845278031343280 | 0.5051190952501400 | 0.4854644823230820 | F | F | F |
| 0.5914297678080689 | 0.6237047414711511 | 0.5184788733468482 | T | T | T |

### Pd3Pt/In2O3

1.000000000000000

|                     |                     |                     |
|---------------------|---------------------|---------------------|
| 10.2175998688000007 | 0.0000000000000000  | 0.0000000000000000  |
| 0.0000000000000000  | 14.4497995377000006 | 0.0000000000000000  |
| 0.0000000000000000  | 0.0000000000000000  | 20.9857006073000001 |

| O  | In | Pd | C |
|----|----|----|---|
| 50 | 32 | 4  | 1 |

### Selective dynamics

#### Direct

|                    |                    |                    |   |   |   |
|--------------------|--------------------|--------------------|---|---|---|
| 0.1819400070000015 | 0.5179200199999985 | 0.1152000000000015 | F | F | F |
| 0.6819400070000015 | 0.0179200010000003 | 0.1152000000000015 | F | F | F |
| 0.6796741836006431 | 0.0282300606787275 | 0.2540252066742101 | F | F | F |
| 0.1802952365098858 | 0.5181830328817369 | 0.2629593164314049 | F | F | F |
| 0.9190464200958827 | 0.3791751396519774 | 0.3606061343168728 | F | F | F |
| 0.4097373681328793 | 0.8836525458104750 | 0.3582106426647080 | F | F | F |
| 0.4229146585424923 | 0.6740303363283386 | 0.3482857055778463 | F | F | F |
| 0.9178931430140396 | 0.1632869982255301 | 0.3495695730843786 | F | F | F |
| 0.9545099699999966 | 0.3958000000000480 | 0.1866899999999987 | F | F | F |
| 0.4545100160000004 | 0.8957999670001067 | 0.1866899999999987 | F | F | F |
| 0.6419719208041736 | 0.7862256046631461 | 0.2643905082380861 | F | F | F |
| 0.1441728979116290 | 0.2866254290536893 | 0.2724788044851401 | F | F | F |
| 0.4545100160000004 | 0.1542000070000000 | 0.1726800109999971 | F | F | F |
| 0.9545099699999966 | 0.6542000230000017 | 0.1726800109999971 | F | F | F |
| 0.1454900069999994 | 0.7638599680000918 | 0.1037499959999977 | F | F | F |
| 0.6454899840000010 | 0.2638599840000011 | 0.1037499959999977 | F | F | F |
| 0.1903399939999985 | 0.2862900060000015 | 0.1125700079999987 | F | F | F |
| 0.6903399589999992 | 0.7862899730000957 | 0.1125700079999987 | F | F | F |
| 0.9096599470000013 | 0.8817800340001049 | 0.1725899979999994 | F | F | F |
| 0.4096599940000019 | 0.3817800010000494 | 0.1725899979999994 | F | F | F |
| 0.4096599940000019 | 0.6682199560000017 | 0.1867800019999990 | F | F | F |
| 0.9096599470000013 | 0.1682200059999988 | 0.1867800019999990 | F | F | F |

|                    |                    |                    |   |   |   |
|--------------------|--------------------|--------------------|---|---|---|
| 0.6894732841851822 | 0.2642157285914255 | 0.2525558201556565 | F | F | F |
| 0.1866839867487988 | 0.7619220178662579 | 0.2527946748894961 | F | F | F |
| 0.4180599929999999 | 0.7820899850000924 | 0.0870100030000032 | F | F | F |
| 0.9180600400000002 | 0.2820900179999983 | 0.0870100030000032 | F | F | F |
| 0.9174989010484126 | 0.7661983487004245 | 0.2848052441010189 | F | F | F |
| 0.4176605009448591 | 0.2669754788291179 | 0.2829164524250300 | F | F | F |
| 0.6819400070000015 | 0.4224300250000457 | 0.1752299990000026 | F | F | F |
| 0.1819400070000015 | 0.9224299590001034 | 0.1752299990000026 | F | F | F |
| 0.1819400070000015 | 0.1275800049999987 | 0.1841400010000029 | F | F | F |
| 0.6819400070000015 | 0.6275799969999982 | 0.1841400010000029 | F | F | F |
| 0.6518797124764344 | 0.3929290529495804 | 0.3457060297208102 | F | F | F |
| 0.1376764744653825 | 0.8968286833370612 | 0.3514411818168991 | F | F | F |
| 0.9567844917620799 | 0.0117763966748524 | 0.2705230094023416 | F | F | F |
| 0.4567106115005784 | 0.5142787125642826 | 0.2711459601200586 | F | F | F |
| 0.1504428420309520 | 0.6516243866934585 | 0.3636060670211907 | F | F | F |
| 0.6457345689800624 | 0.1512146716199164 | 0.3629925991891272 | F | F | F |
| 0.4545100160000004 | 0.5361400390000048 | 0.0984700050000029 | F | F | F |
| 0.9545099699999966 | 0.0361399980000030 | 0.0984700050000029 | F | F | F |
| 0.4096599940000019 | 0.0137100000000048 | 0.0896599969999983 | F | F | F |
| 0.9096599470000013 | 0.5137100339999991 | 0.0896599969999983 | F | F | F |
| 0.7145865945249815 | 0.9169553531329022 | 0.3675778384928580 | F | F | F |
| 0.3071379086077928 | 0.3953139530262360 | 0.3960348036843744 | F | F | F |
| 0.2011403799991777 | 0.1316607536865542 | 0.3568549231543219 | F | F | F |
| 0.6931254230947330 | 0.6455294883992200 | 0.3606863490828504 | F | F | F |
| 0.8978047982040588 | 0.5387544300066690 | 0.2827357515742225 | F | F | F |
| 0.4065235115562428 | 0.0387352667569918 | 0.2780262647788972 | F | F | F |
| 0.6317579235754788 | 0.6528350093211998 | 0.5669053335071630 | T | T | T |
| 0.4141170109505529 | 0.6155898058371974 | 0.5044061365279372 | T | T | T |
| 0.7999999999999972 | 0.7581899820000910 | 0.1902599909999978 | F | F | F |
| 0.3000000230000026 | 0.7918100090000958 | 0.1691199950000026 | F | F | F |
| 0.3000000230000026 | 0.2581899979999991 | 0.1902599909999978 | F | F | F |
| 0.7999999999999972 | 0.2918100090000028 | 0.1691199950000026 | F | F | F |
| 0.8336300499999965 | 0.0250000010000051 | 0.1796899989999972 | F | F | F |
| 0.7749063077098519 | 0.2681307210088158 | 0.3491138272529333 | F | F | F |
| 0.3336300030000032 | 0.5249999790000024 | 0.1796899989999972 | F | F | F |
| 0.2652381919272515 | 0.7751699040495025 | 0.3500392723926820 | F | F | F |
| 0.5449431634330608 | 0.9169241786330882 | 0.2811629878308925 | F | F | F |
| 0.5499999999999972 | 0.1331900059999997 | 0.0905399970000005 | F | F | F |
| 0.0330096964348105 | 0.4128158603273161 | 0.2791182903417063 | F | F | F |
| 0.0499999999999972 | 0.6331899899999991 | 0.0905399970000005 | F | F | F |
| 0.7949834617891955 | 0.0449792321708886 | 0.3415875432201256 | F | F | F |
| 0.2818008091405120 | 0.9999462341025116 | 0.3538667030740400 | F | F | F |
| 0.3028281661474920 | 0.5463896684449194 | 0.3466596137833833 | F | F | F |
| 0.7935823934670586 | 0.5026833804400176 | 0.3696914477999483 | F | F | F |

|                    |                    |                    |   |   |   |
|--------------------|--------------------|--------------------|---|---|---|
| 0.7620390788083122 | 0.7825332052005970 | 0.3487152986552199 | F | F | F |
| 0.8336300499999965 | 0.5249999790000024 | 0.1796899989999972 | F | F | F |
| 0.2710489552697479 | 0.2674421911638680 | 0.3537684815197054 | F | F | F |
| 0.3336300030000032 | 0.0250000010000051 | 0.1796899989999972 | F | F | F |
| 0.0490631280144158 | 0.8814576285554385 | 0.2581410382905127 | F | F | F |
| 0.0499999999999972 | 0.1668099999999982 | 0.1116699999999966 | F | F | F |
| 0.5489154737029990 | 0.3818211002960385 | 0.2562501294776874 | F | F | F |
| 0.5499999999999972 | 0.6668099509999977 | 0.1116699999999966 | F | F | F |
| 0.5499999999999972 | 0.4000000200000470 | 0.1011099950000016 | F | F | F |
| 0.0487742801901584 | 0.1477926625037067 | 0.2713733061980418 | F | F | F |
| 0.5499999999999972 | 0.8999999540001065 | 0.1011099950000016 | F | F | F |
| 0.0491827527240432 | 0.6466289932794609 | 0.2726125203680507 | F | F | F |
| 0.0499999999999972 | 0.4000000200000470 | 0.1011099950000016 | F | F | F |
| 0.0499999999999972 | 0.8999999540001065 | 0.1011099950000016 | F | F | F |
| 0.5492065720535728 | 0.6504247008875828 | 0.2672816153877448 | F | F | F |
| 0.5517529448641874 | 0.1495617162157409 | 0.2697560466815759 | F | F | F |
| 0.3293412915054466 | 0.5042402586217934 | 0.4694959668370262 | F | F | F |
| 0.5152561534490373 | 0.4349577524854827 | 0.4127282265636640 | F | F | F |
| 0.6888555477608055 | 0.5023470237077200 | 0.4889329709371231 | F | F | F |
| 0.5418326480650720 | 0.6419866509518360 | 0.4300637530355966 | F | F | F |
| 0.5965571594265239 | 0.6214711014146411 | 0.5173353189155168 | T | T | T |

### Pd4/In2O3

1.0000000000000000

10.2175998688000007 0.0000000000000000 0.0000000000000000

0.0000000000000000 14.4497995377000006 0.0000000000000000

0.0000000000000000 0.0000000000000000 20.9857006073000001

O In Pd Pt C

50 32 1 3 1

### Selective dynamics

#### Direct

|                    |                    |                    |   |   |   |
|--------------------|--------------------|--------------------|---|---|---|
| 0.1819400070000015 | 0.5179200199999985 | 0.1152000000000015 | F | F | F |
| 0.6819400070000015 | 0.0179200010000003 | 0.1152000000000015 | F | F | F |
| 0.6800806884961519 | 0.0297287034679657 | 0.2532715828180243 | F | F | F |
| 0.1824425915816819 | 0.5182922676817440 | 0.2645412868235001 | F | F | F |
| 0.9125411230182372 | 0.3763655011380964 | 0.3578021818504473 | F | F | F |
| 0.4104838407387491 | 0.8845179447058278 | 0.3583709012678181 | F | F | F |
| 0.4311832460677445 | 0.6759857426614266 | 0.3480286884662410 | F | F | F |
| 0.9160217736280721 | 0.1628997636363408 | 0.3497147308738220 | F | F | F |
| 0.9545099699999966 | 0.3958000000000613 | 0.1866899999999987 | F | F | F |
| 0.4545100160000004 | 0.8957999670001365 | 0.1866899999999987 | F | F | F |
| 0.6425545356559822 | 0.7869163360408624 | 0.2641387896609924 | F | F | F |
| 0.1445741094808557 | 0.2866422757147586 | 0.2732298221605439 | F | F | F |

|                    |                    |                    |   |   |   |
|--------------------|--------------------|--------------------|---|---|---|
| 0.4545100160000004 | 0.1542000070000000 | 0.1726800109999971 | F | F | F |
| 0.9545099699999966 | 0.6542000230000017 | 0.1726800109999971 | F | F | F |
| 0.1454900069999994 | 0.7638599680001186 | 0.1037499959999977 | F | F | F |
| 0.6454899840000010 | 0.2638599840000011 | 0.1037499959999977 | F | F | F |
| 0.1903399939999985 | 0.2862900060000015 | 0.1125700079999987 | F | F | F |
| 0.6903399589999992 | 0.7862899730001225 | 0.1125700079999987 | F | F | F |
| 0.9096599470000013 | 0.8817800340001344 | 0.1725899979999994 | F | F | F |
| 0.4096599940000019 | 0.3817800010000628 | 0.1725899979999994 | F | F | F |
| 0.4096599940000019 | 0.6682199560000017 | 0.1867800019999990 | F | F | F |
| 0.9096599470000013 | 0.1682200059999988 | 0.1867800019999990 | F | F | F |
| 0.6896560264427848 | 0.2666243914270641 | 0.2536231482925949 | F | F | F |
| 0.1861287637859272 | 0.7612884936117850 | 0.2531612954517954 | F | F | F |
| 0.4180599929999999 | 0.7820899850001191 | 0.0870100030000032 | F | F | F |
| 0.9180600400000002 | 0.2820900179999983 | 0.0870100030000032 | F | F | F |
| 0.9154985504535083 | 0.7648521882983763 | 0.2879979544280560 | F | F | F |
| 0.4181559650991990 | 0.2665537090536633 | 0.2819727864604147 | F | F | F |
| 0.6819400070000015 | 0.4224300250000596 | 0.1752299990000026 | F | F | F |
| 0.1819400070000015 | 0.9224299590001332 | 0.1752299990000026 | F | F | F |
| 0.1819400070000015 | 0.1275800049999987 | 0.1841400010000029 | F | F | F |
| 0.6819400070000015 | 0.6275799969999982 | 0.1841400010000029 | F | F | F |
| 0.6365343319139942 | 0.3897966792892794 | 0.3518682021071061 | F | F | F |
| 0.1389495818348866 | 0.8965510422857034 | 0.3514002291198571 | F | F | F |
| 0.9571651040248672 | 0.0116375797157954 | 0.2705478541984851 | F | F | F |
| 0.4569012294210820 | 0.5141571694035977 | 0.2698648578880074 | F | F | F |
| 0.1592719782411348 | 0.6504928619796735 | 0.3649034054091356 | F | F | F |
| 0.6427663161222924 | 0.1498667338208725 | 0.3630376275437211 | F | F | F |
| 0.4545100160000004 | 0.5361400390000048 | 0.0984700050000029 | F | F | F |
| 0.9545099699999966 | 0.0361399980000030 | 0.0984700050000029 | F | F | F |
| 0.4096599940000019 | 0.0137100000000053 | 0.0896599969999983 | F | F | F |
| 0.9096599470000013 | 0.5137100339999991 | 0.0896599969999983 | F | F | F |
| 0.7108906566768677 | 0.9181653702369720 | 0.3655394288296940 | F | F | F |
| 0.3095221584361021 | 0.3981545794643059 | 0.3945537322476378 | F | F | F |
| 0.2021015958313748 | 0.1327333135662969 | 0.3572630822725861 | F | F | F |
| 0.6975939445326955 | 0.6338850917898796 | 0.3456549541661548 | F | F | F |
| 0.9018207472096155 | 0.5365346662315266 | 0.2825574295838982 | F | F | F |
| 0.4065942763478618 | 0.0389163264462881 | 0.2778737828830407 | F | F | F |
| 0.6840658058854671 | 0.6709559131195645 | 0.5571039767168403 | T | T | T |
| 0.4642336496030481 | 0.6447648073113442 | 0.5031493928191128 | T | T | T |
| 0.7999999999999972 | 0.7581899820001177 | 0.1902599909999978 | F | F | F |
| 0.3000000230000026 | 0.7918100090001225 | 0.1691199950000026 | F | F | F |
| 0.3000000230000026 | 0.2581899979999991 | 0.1902599909999978 | F | F | F |
| 0.7999999999999972 | 0.2918100090000028 | 0.1691199950000026 | F | F | F |
| 0.8336300499999965 | 0.0250000010000060 | 0.1796899989999972 | F | F | F |
| 0.7698539634935860 | 0.2662922442202967 | 0.3506611447361169 | F | F | F |

|                    |                     |                    |   |   |   |
|--------------------|---------------------|--------------------|---|---|---|
| 0.3336300030000032 | 0.5249999790000024  | 0.1796899989999972 | F | F | F |
| 0.2690284647385333 | 0.7756420319146465  | 0.3496994906003550 | F | F | F |
| 0.5462539140344361 | 0.9173863748546097  | 0.2813644420240292 | F | F | F |
| 0.5499999999999972 | 0.1331900059999997  | 0.0905399970000005 | F | F | F |
| 0.0346229245143293 | 0.4126494591536694  | 0.2784985475799825 | F | F | F |
| 0.0499999999999972 | 0.6331899899999991  | 0.0905399970000005 | F | F | F |
| 0.7945630600163588 | 0.04463629223049728 | 0.3414500548362583 | F | F | F |
| 0.2819445597301199 | 1.0004070155063214  | 0.3537574316168670 | F | F | F |
| 0.3104938448049171 | 0.5451810881840551  | 0.3486185536273785 | F | F | F |
| 0.7909633837197939 | 0.4974383456600052  | 0.3674169247244934 | F | F | F |
| 0.7544611109473277 | 0.7805607366357986  | 0.3515364969791659 | F | F | F |
| 0.8336300499999965 | 0.5249999790000024  | 0.1796899989999972 | F | F | F |
| 0.2746120828176056 | 0.2677771602335810  | 0.3533847647641463 | F | F | F |
| 0.3336300030000032 | 0.0250000010000060  | 0.1796899989999972 | F | F | F |
| 0.0465899231268347 | 0.8800449624736710  | 0.2592436061184357 | F | F | F |
| 0.0499999999999972 | 0.1668099999999982  | 0.1116699999999966 | F | F | F |
| 0.5481012265777592 | 0.3822169335170977  | 0.2569286985318820 | F | F | F |
| 0.5499999999999972 | 0.6668099509999977  | 0.1116699999999966 | F | F | F |
| 0.5499999999999972 | 0.4000000200000603  | 0.1011099950000016 | F | F | F |
| 0.0482735267478367 | 0.1478515418738492  | 0.2718248767232317 | F | F | F |
| 0.5499999999999972 | 0.8999999540001363  | 0.1011099950000016 | F | F | F |
| 0.0506425527914712 | 0.6461536544723760  | 0.2743435369153040 | F | F | F |
| 0.0499999999999972 | 0.4000000200000603  | 0.1011099950000016 | F | F | F |
| 0.0499999999999972 | 0.8999999540001363  | 0.1011099950000016 | F | F | F |
| 0.5498555966278696 | 0.6500960131192290  | 0.2644709530533224 | F | F | F |
| 0.5519853599279755 | 0.1495145374414768  | 0.2691349276129530 | F | F | F |
| 0.3442033379094241 | 0.5365118988354254  | 0.4837687286362465 | F | F | F |
| 0.5009568016593009 | 0.4400468836573624  | 0.4198343399339292 | F | F | F |
| 0.5736276299340437 | 0.6561972784912226  | 0.4218741659473937 | F | F | F |
| 0.6882133016259484 | 0.5065707375377896  | 0.4841500522288948 | F | F | F |
| 0.6321815921162111 | 0.6381323886822842  | 0.5108409139853215 | T | T | T |

### PdPt3/In2O3

1.000000000000000

|                     |                     |                     |
|---------------------|---------------------|---------------------|
| 10.2175998688000007 | 0.0000000000000000  | 0.0000000000000000  |
| 0.0000000000000000  | 14.4497995377000006 | 0.0000000000000000  |
| 0.0000000000000000  | 0.0000000000000000  | 20.9857006073000001 |

| O  | In | Pt | C |
|----|----|----|---|
| 50 | 32 | 4  | 1 |

### Selective dynamics

#### Direct

|                    |                    |                    |   |   |   |
|--------------------|--------------------|--------------------|---|---|---|
| 0.1819400070000015 | 0.5179200199999985 | 0.1152000000000015 | F | F | F |
| 0.6819400070000015 | 0.0179200010000003 | 0.1152000000000015 | F | F | F |

|                    |                    |                    |   |   |   |
|--------------------|--------------------|--------------------|---|---|---|
| 0.6803060597048306 | 0.0276260756891515 | 0.2538112003384810 | F | F | F |
| 0.1789165111507644 | 0.5178937219353758 | 0.2636980259637373 | F | F | F |
| 0.9072259261321191 | 0.3762426661076456 | 0.3577734443361221 | F | F | F |
| 0.4094078977191244 | 0.8829307685859380 | 0.3583273453584674 | F | F | F |
| 0.4271727156267328 | 0.6738773823576566 | 0.3492372627902546 | F | F | F |
| 0.9140758436531248 | 0.1629653008461316 | 0.3496985820790095 | F | F | F |
| 0.9545099699999966 | 0.3958000000000475 | 0.1866899999999987 | F | F | F |
| 0.4545100160000004 | 0.8957999670001077 | 0.1866899999999987 | F | F | F |
| 0.6429486552520882 | 0.7887502438851983 | 0.2633311883955710 | F | F | F |
| 0.1420079206805877 | 0.2857847348553493 | 0.2729297889033018 | F | F | F |
| 0.4545100160000004 | 0.1542000070000000 | 0.1726800109999971 | F | F | F |
| 0.9545099699999966 | 0.6542000230000017 | 0.1726800109999971 | F | F | F |
| 0.1454900069999994 | 0.7638599680000909 | 0.1037499959999977 | F | F | F |
| 0.6454899840000010 | 0.2638599840000011 | 0.1037499959999977 | F | F | F |
| 0.1903399939999985 | 0.2862900060000015 | 0.1125700079999987 | F | F | F |
| 0.6903399589999992 | 0.7862899730000947 | 0.1125700079999987 | F | F | F |
| 0.9096599470000013 | 0.8817800340001066 | 0.1725899979999994 | F | F | F |
| 0.4096599940000019 | 0.3817800010000489 | 0.1725899979999994 | F | F | F |
| 0.4096599940000019 | 0.6682199560000017 | 0.1867800019999990 | F | F | F |
| 0.9096599470000013 | 0.1682200059999988 | 0.1867800019999990 | F | F | F |
| 0.6893125966240984 | 0.2672843273204078 | 0.2539672617208001 | F | F | F |
| 0.1877927343068574 | 0.7605360003595150 | 0.2538340076657064 | F | F | F |
| 0.4180599929999999 | 0.7820899850000914 | 0.0870100030000032 | F | F | F |
| 0.9180600400000002 | 0.2820900179999983 | 0.0870100030000032 | F | F | F |
| 0.9189549902024253 | 0.7651012569335816 | 0.2858422151049790 | F | F | F |
| 0.4188443577383936 | 0.2634867223338906 | 0.2801905422782402 | F | F | F |
| 0.6819400070000015 | 0.4224300250000443 | 0.1752299990000026 | F | F | F |
| 0.1819400070000015 | 0.9224299590001043 | 0.1752299990000026 | F | F | F |
| 0.1819400070000015 | 0.1275800049999987 | 0.1841400010000029 | F | F | F |
| 0.6819400070000015 | 0.6275799969999982 | 0.1841400010000029 | F | F | F |
| 0.6271885707000706 | 0.3864200628033291 | 0.3580131857273471 | F | F | F |
| 0.1372349742623050 | 0.8956188458048158 | 0.3520105995688801 | F | F | F |
| 0.9569283104479001 | 0.0110869053609831 | 0.2708672646703121 | F | F | F |
| 0.4578209258477136 | 0.5155100981579936 | 0.2711853410740047 | F | F | F |
| 0.1572121947775411 | 0.6485993756926434 | 0.3655883072386509 | F | F | F |
| 0.6412429024966315 | 0.1477923082866358 | 0.3626737951042581 | F | F | F |
| 0.4545100160000004 | 0.5361400390000048 | 0.0984700050000029 | F | F | F |
| 0.9545099699999966 | 0.0361399980000030 | 0.0984700050000029 | F | F | F |
| 0.4096599940000019 | 0.0137100000000041 | 0.0896599969999983 | F | F | F |
| 0.9096599470000013 | 0.5137100339999991 | 0.0896599969999983 | F | F | F |
| 0.7128019257968702 | 0.9172364964900551 | 0.3687918215902676 | F | F | F |
| 0.3195404590470206 | 0.3981182317744229 | 0.3777771691235632 | F | F | F |
| 0.1994887613468946 | 0.1307914662530354 | 0.3582537245913678 | F | F | F |
| 0.6945006004940772 | 0.6447799807696929 | 0.3504099959917377 | F | F | F |

|                    |                    |                    |   |   |   |
|--------------------|--------------------|--------------------|---|---|---|
| 0.8969073777883049 | 0.5371095479374963 | 0.2839688474550884 | F | F | F |
| 0.4056146379577594 | 0.0383923445627539 | 0.2782212258260248 | F | F | F |
| 0.4105768731819298 | 0.3957254747927698 | 0.5756190688121073 | T | T | T |
| 0.6107808720348485 | 0.4195532123904562 | 0.5094618627130295 | T | T | T |
| 0.7999999999999972 | 0.7581899820000900 | 0.1902599909999978 | F | F | F |
| 0.3000000230000026 | 0.7918100090000949 | 0.1691199950000026 | F | F | F |
| 0.3000000230000026 | 0.2581899979999991 | 0.1902599909999978 | F | F | F |
| 0.7999999999999972 | 0.2918100090000028 | 0.1691199950000026 | F | F | F |
| 0.8336300499999965 | 0.0250000010000038 | 0.1796899989999972 | F | F | F |
| 0.7661466645888336 | 0.2658046211710892 | 0.3513170992159980 | F | F | F |
| 0.3336300030000032 | 0.5249999790000024 | 0.1796899989999972 | F | F | F |
| 0.2661082904543545 | 0.7744589481450533 | 0.3509594456290995 | F | F | F |
| 0.5437467415460694 | 0.9173843693355402 | 0.2810842235246018 | F | F | F |
| 0.5499999999999972 | 0.1331900059999997 | 0.0905399970000005 | F | F | F |
| 0.0304745283390169 | 0.4118689682737912 | 0.2794153881897753 | F | F | F |
| 0.0499999999999972 | 0.6331899899999991 | 0.0905399970000005 | F | F | F |
| 0.7944948483326532 | 0.0439484778339574 | 0.3420254155841179 | F | F | F |
| 0.2809453598012831 | 0.9990576756219413 | 0.3539596850984132 | F | F | F |
| 0.3060186904021300 | 0.5432246896566884 | 0.3477049215820867 | F | F | F |
| 0.7855269392591596 | 0.4967115136505715 | 0.3698938037724138 | F | F | F |
| 0.7610615396884058 | 0.7838072824196071 | 0.3483326767019939 | F | F | F |
| 0.8336300499999965 | 0.5249999790000024 | 0.1796899989999972 | F | F | F |
| 0.2753011385771945 | 0.2632453422229820 | 0.3507105743865561 | F | F | F |
| 0.3336300030000032 | 0.0250000010000038 | 0.1796899989999972 | F | F | F |
| 0.0493911740073334 | 0.8806359011834487 | 0.2581923009217644 | F | F | F |
| 0.0499999999999972 | 0.1668099999999982 | 0.1116699999999966 | F | F | F |
| 0.5470005307535218 | 0.3823339966301352 | 0.2588694456329335 | F | F | F |
| 0.5499999999999972 | 0.6668099509999977 | 0.1116699999999966 | F | F | F |
| 0.5499999999999972 | 0.4000000200000464 | 0.1011099950000016 | F | F | F |
| 0.0456645202041399 | 0.1478985758720671 | 0.2714924247305459 | F | F | F |
| 0.5499999999999972 | 0.8999999540001075 | 0.1011099950000016 | F | F | F |
| 0.0496769256872768 | 0.6449696309893157 | 0.2737686776932893 | F | F | F |
| 0.0499999999999972 | 0.4000000200000464 | 0.1011099950000016 | F | F | F |
| 0.0499999999999972 | 0.8999999540001075 | 0.1011099950000016 | F | F | F |
| 0.5499161276257198 | 0.6517815522993105 | 0.2652684654448184 | F | F | F |
| 0.5534795123613458 | 0.1484216388166602 | 0.2681096285988829 | F | F | F |
| 0.3805742940350573 | 0.5511333557409449 | 0.4931169434791267 | F | F | F |
| 0.4827704087021610 | 0.4048475996242475 | 0.4337302908376112 | F | F | F |
| 0.7119357662883505 | 0.5330229856471761 | 0.4885033948387754 | F | F | F |
| 0.5521489614352386 | 0.6157554550992715 | 0.4180747486898646 | F | F | F |
| 0.4514888332307765 | 0.4303046232470590 | 0.5273798397209215 | T | T | T |

Pt4/In2O3



1.0000000000000000  
 10.2175998688000007 0.0000000000000000 0.0000000000000000  
 0.0000000000000000 14.4497995377000006 0.0000000000000000  
 0.0000000000000000 0.0000000000000000 20.9857006073000001

O In Pd Pt C  
 50 32 3 1 1

Selective dynamics

Direct

|                    |                    |                    |   |   |   |
|--------------------|--------------------|--------------------|---|---|---|
| 0.1819400070000015 | 0.5179200199999985 | 0.1152000000000015 | F | F | F |
| 0.6819400070000015 | 0.0179200010000003 | 0.1152000000000015 | F | F | F |
| 0.6795664257040763 | 0.0279973488141038 | 0.2540094967017761 | T | T | T |
| 0.1802512298950760 | 0.5181914491879532 | 0.2629936357873948 | T | T | T |
| 0.9177204331588205 | 0.3791932425172004 | 0.3600504813139958 | T | T | T |
| 0.4095714011675828 | 0.8834466120814753 | 0.3582180437438539 | T | T | T |
| 0.4219198374535268 | 0.6740659738830214 | 0.3478137962937300 | T | T | T |
| 0.9169003480751835 | 0.1633683209272971 | 0.3494097682010006 | T | T | T |
| 0.9545099699999966 | 0.3958000000000982 | 0.1866899999999987 | F | F | F |
| 0.4545100160000004 | 0.8957999670002250 | 0.1866899999999987 | F | F | F |
| 0.6418757488071873 | 0.7857818427112294 | 0.2646118978997443 | T | T | T |
| 0.1434244329609922 | 0.2863144764646416 | 0.2722087875700391 | T | T | T |
| 0.4545100160000004 | 0.1542000070000000 | 0.1726800109999971 | F | F | F |
| 0.9545099699999966 | 0.6542000230000017 | 0.1726800109999971 | F | F | F |
| 0.1454900069999994 | 0.7638599680001995 | 0.1037499959999977 | F | F | F |
| 0.6454899840000010 | 0.2638599840000011 | 0.1037499959999977 | F | F | F |
| 0.1903399939999985 | 0.2862900060000015 | 0.1125700079999987 | F | F | F |
| 0.6903399589999992 | 0.7862899730002034 | 0.1125700079999987 | F | F | F |
| 0.9096599470000013 | 0.8817800340002226 | 0.1725899979999994 | F | F | F |
| 0.4096599940000019 | 0.3817800010000997 | 0.1725899979999994 | F | F | F |
| 0.4096599940000019 | 0.6682199560000017 | 0.1867800019999990 | F | F | F |
| 0.9096599470000013 | 0.1682200059999988 | 0.1867800019999990 | F | F | F |
| 0.6892912432393193 | 0.2644799279744970 | 0.2526329749784031 | T | T | T |
| 0.1863049478906429 | 0.7617296283793947 | 0.2527414285254825 | T | T | T |
| 0.4180599929999999 | 0.7820899850002001 | 0.0870100030000032 | F | F | F |
| 0.9180600400000002 | 0.2820900179999983 | 0.0870100030000032 | F | F | F |
| 0.9171386745631508 | 0.7658392086204555 | 0.2850232477571236 | T | T | T |
| 0.4175510482191085 | 0.2667460312146444 | 0.2827809265947032 | T | T | T |
| 0.6819400070000015 | 0.4224300250001038 | 0.1752299990000026 | F | F | F |
| 0.1819400070000015 | 0.9224299590002216 | 0.1752299990000026 | F | F | F |
| 0.1819400070000015 | 0.1275800049999987 | 0.1841400010000029 | F | F | F |
| 0.6819400070000015 | 0.6275799969999982 | 0.1841400010000029 | F | F | F |
| 0.6487813117951416 | 0.3927760092113070 | 0.3470374011958466 | T | T | T |
| 0.1373757004526129 | 0.8963772865194746 | 0.3514444463671854 | T | T | T |
| 0.9564131793375947 | 0.0115170439337202 | 0.2706106306126170 | T | T | T |
| 0.4565806593244047 | 0.5140438324809918 | 0.2712445630287043 | T | T | T |

|                    |                     |                    |   |   |   |
|--------------------|---------------------|--------------------|---|---|---|
| 0.1498640353807450 | 0.6511510017228458  | 0.3639249109794223 | T | T | T |
| 0.6449766959022971 | 0.1508969641668355  | 0.3629349817689991 | T | T | T |
| 0.4545100160000004 | 0.5361400390000048  | 0.0984700050000029 | F | F | F |
| 0.9545099699999966 | 0.0361399980000030  | 0.0984700050000029 | F | F | F |
| 0.4096599940000019 | 0.0137100000000053  | 0.0896599969999983 | F | F | F |
| 0.9096599470000013 | 0.5137100339999991  | 0.0896599969999983 | F | F | F |
| 0.7144492994148848 | 0.9162037618949129  | 0.3673399935499024 | T | T | T |
| 0.3035123266939095 | 0.3949752019758835  | 0.3947507728425682 | T | T | T |
| 0.1999036493012072 | 0.1308872118380543  | 0.3567286818018777 | T | T | T |
| 0.6937992701626976 | 0.6434379173188760  | 0.3597590349221990 | T | T | T |
| 0.8978931479942280 | 0.5386237819743964  | 0.2827812400295708 | T | T | T |
| 0.4064064664484364 | 0.0386483482227480  | 0.2780528080841583 | T | T | T |
| 0.4221920232117244 | 0.6094261922979297  | 0.506436777637732  | T | T | T |
| 0.6397663357260868 | 0.6472269805770700  | 0.5646713672503557 | T | T | T |
| 0.799999999999972  | 0.7581899820001987  | 0.1902599909999978 | F | F | F |
| 0.3000000230000026 | 0.7918100090002035  | 0.1691199950000026 | F | F | F |
| 0.3000000230000026 | 0.2581899979999991  | 0.1902599909999978 | F | F | F |
| 0.799999999999972  | 0.2918100090000028  | 0.1691199950000026 | F | F | F |
| 0.8336300499999965 | 0.0250000010000061  | 0.1796899989999972 | F | F | F |
| 0.7736600704196352 | 0.2681596450213434  | 0.3492913194547624 | T | T | T |
| 0.3336300030000032 | 0.5249999790000024  | 0.1796899989999972 | F | F | F |
| 0.2650184462825064 | 0.7748000881920721  | 0.3500286083728129 | T | T | T |
| 0.5448945395120455 | 0.9165631477380862  | 0.2812818885234984 | T | T | T |
| 0.549999999999972  | 0.1331900059999997  | 0.0905399970000005 | F | F | F |
| 0.0331525850773392 | 0.4127674162289730  | 0.2790235756995094 | T | T | T |
| 0.049999999999972  | 0.6331899899999991  | 0.0905399970000005 | F | F | F |
| 0.7944358258912843 | 0.0447220555986704  | 0.3416946676901182 | T | T | T |
| 0.2815864035560554 | -0.0005874480963113 | 0.3537676686659365 | T | T | T |
| 0.3030424425804303 | 0.5465551922893092  | 0.3467706108293110 | T | T | T |
| 0.7933419516541913 | 0.5021061098965679  | 0.3691699193028184 | T | T | T |
| 0.7614879072472526 | 0.7813649026472914  | 0.3490218862412213 | T | T | T |
| 0.8336300499999965 | 0.5249999790000024  | 0.1796899989999972 | F | F | F |
| 0.2702944616478543 | 0.2660853016540380  | 0.3530650225131833 | T | T | T |
| 0.3336300030000032 | 0.0250000010000061  | 0.1796899989999972 | F | F | F |
| 0.0486809327173457 | 0.8811598256013832  | 0.2581870306284499 | T | T | T |
| 0.049999999999972  | 0.1668099999999982  | 0.1116699999999966 | F | F | F |
| 0.5489895353082396 | 0.3818950602782222  | 0.2564673862885742 | T | T | T |
| 0.549999999999972  | 0.6668099509999977  | 0.1116699999999966 | F | F | F |
| 0.549999999999972  | 0.4000000200000973  | 0.1011099950000016 | F | F | F |
| 0.0479881056523774 | 0.1474793782495208  | 0.2712808071785746 | T | T | T |
| 0.549999999999972  | 0.8999999540002249  | 0.1011099950000016 | F | F | F |
| 0.0492603213800048 | 0.6465386719977058  | 0.2726179950209028 | T | T | T |
| 0.049999999999972  | 0.4000000200000973  | 0.1011099950000016 | F | F | F |
| 0.049999999999972  | 0.8999999540002249  | 0.1011099950000016 | F | F | F |

|                    |                    |                    |   |   |   |
|--------------------|--------------------|--------------------|---|---|---|
| 0.5486885313574423 | 0.6502670741364778 | 0.2672262860303929 | T | T | T |
| 0.5518845900730449 | 0.1493595252488980 | 0.2695485240881539 | T | T | T |
| 0.3261989464565964 | 0.5033055029696976 | 0.4707411973656492 | T | T | T |
| 0.5066432031590680 | 0.4280418594520152 | 0.4149339307882080 | T | T | T |
| 0.5437363033814945 | 0.6387486530322889 | 0.4299513187692930 | T | T | T |
| 0.6859213393940028 | 0.4921954498899050 | 0.4862363128545337 | T | T | T |
| 0.6024575645370576 | 0.6105166444264783 | 0.5168213914300883 | T | T | T |

## CO and O co-adsorption on Pd<sub>n</sub>Pt(4-n)/In<sub>2</sub>O<sub>3</sub> catalysts

Pd<sub>2</sub>Pt<sub>2</sub>/In<sub>2</sub>O<sub>3</sub>

1.0000000000000000  
 10.2175998688000007 0.0000000000000000 0.0000000000000000  
 0.0000000000000000 14.4497995377000006 0.0000000000000000  
 0.0000000000000000 0.0000000000000000 20.9857006073000001

O In Pd Pt C  
 50 32 2 2 1

Selective dynamics

Direct

|                    |                    |                    |   |   |   |
|--------------------|--------------------|--------------------|---|---|---|
| 0.1819400070000015 | 0.5179200199999983 | 0.1152000000000015 | F | F | F |
| 0.6819400070000015 | 0.0179200010000002 | 0.1152000000000015 | F | F | F |
| 0.6797118614789166 | 0.0286555211434135 | 0.2533888366132040 | T | T | T |
| 0.1804970670577834 | 0.5185066718945308 | 0.2620042994007155 | T | T | T |
| 0.9173690748398395 | 0.3760763781997258 | 0.3575963693562678 | T | T | T |
| 0.4086999472450688 | 0.8842609356252452 | 0.3582018534522659 | T | T | T |
| 0.4244639361306626 | 0.6741500345966273 | 0.3468467741578656 | T | T | T |
| 0.9169955966989161 | 0.1625248688199032 | 0.3495693135261938 | T | T | T |
| 0.9545099699999966 | 0.3958000000000013 | 0.1866899999999987 | F | F | F |
| 0.4545100160000004 | 0.8957999670000021 | 0.1866899999999987 | F | F | F |
| 0.6410167486360818 | 0.7858028943605337 | 0.2642250754886561 | T | T | T |
| 0.1460282253768798 | 0.2869468706602050 | 0.2726158199186081 | T | T | T |
| 0.4545100160000004 | 0.1542000070000000 | 0.1726800109999971 | F | F | F |
| 0.9545099699999966 | 0.6542000230000014 | 0.1726800109999971 | F | F | F |
| 0.1454900069999994 | 0.7638599679999984 | 0.1037499959999977 | F | F | F |
| 0.6454899840000010 | 0.2638599839999998 | 0.1037499959999977 | F | F | F |
| 0.1903399939999986 | 0.2862900060000015 | 0.1125700079999987 | F | F | F |
| 0.6903399589999992 | 0.7862899730000024 | 0.1125700079999987 | F | F | F |
| 0.9096599470000015 | 0.8817800340000019 | 0.1725899979999994 | F | F | F |
| 0.4096599940000019 | 0.3817800010000028 | 0.1725899979999994 | F | F | F |
| 0.4096599940000019 | 0.6682199560000015 | 0.1867800019999990 | F | F | F |
| 0.9096599470000015 | 0.1682200059999985 | 0.1867800019999990 | F | F | F |
| 0.6894765302772755 | 0.2651948325853008 | 0.2528009055914961 | T | T | T |
| 0.1860321665543957 | 0.7621644768141327 | 0.2531510360836263 | T | T | T |
| 0.4180599930000000 | 0.7820899849999989 | 0.0870100030000032 | F | F | F |
| 0.9180600400000003 | 0.2820900179999981 | 0.0870100030000032 | F | F | F |
| 0.9145556679693939 | 0.7658407140928356 | 0.2864083609057350 | T | T | T |
| 0.4185128509982188 | 0.2667712111296457 | 0.2822964499956088 | T | T | T |
| 0.6819400070000015 | 0.4224300249999970 | 0.1752299990000026 | F | F | F |
| 0.1819400070000015 | 0.9224299589999987 | 0.1752299990000026 | F | F | F |
| 0.1819400070000015 | 0.1275800049999987 | 0.1841400010000029 | F | F | F |
| 0.6819400070000015 | 0.6275799969999980 | 0.1841400010000029 | F | F | F |

|                    |                    |                    |   |   |   |
|--------------------|--------------------|--------------------|---|---|---|
| 0.6431701475568989 | 0.3903642765483543 | 0.3500970976381186 | T | T | T |
| 0.1373434632654619 | 0.8972376789242441 | 0.3518187476539573 | T | T | T |
| 0.9574119493705097 | 0.0118840866239754 | 0.2702591847458522 | T | T | T |
| 0.4568314008250920 | 0.5136045184659913 | 0.2706056288136598 | T | T | T |
| 0.1517391514736707 | 0.6506796532998457 | 0.3632845831948443 | T | T | T |
| 0.6445672426848186 | 0.1499983663141050 | 0.3627420748188573 | T | T | T |
| 0.4545100160000004 | 0.5361400390000028 | 0.0984700050000029 | F | F | F |
| 0.9545099699999966 | 0.0361399980000030 | 0.0984700050000029 | F | F | F |
| 0.4096599940000019 | 0.0137100000000032 | 0.0896599969999983 | F | F | F |
| 0.9096599470000015 | 0.5137100339999989 | 0.0896599969999983 | F | F | F |
| 0.7119163109544671 | 0.9170425203830461 | 0.3656825201074599 | T | T | T |
| 0.3120570431794707 | 0.4008085343225201 | 0.3948554155766363 | T | T | T |
| 0.2032426546522750 | 0.1338122350632463 | 0.3568234583107762 | T | T | T |
| 0.6956636783149064 | 0.6369463027740372 | 0.3520962785025117 | T | T | T |
| 0.8996873612113643 | 0.5371963048545657 | 0.2822742910625746 | T | T | T |
| 0.4063567740907518 | 0.0386996400656841 | 0.2778634125985063 | T | T | T |
| 0.7467091877425109 | 0.6723994707293218 | 0.5313432530700036 | T | T | T |
| 0.4053021676476128 | 0.6555306997058583 | 0.4833830607444036 | T | T | T |
| 0.799999999999972  | 0.7581899819999975 | 0.1902599909999978 | F | F | F |
| 0.3000000230000026 | 0.7918100090000024 | 0.1691199950000026 | F | F | F |
| 0.3000000230000026 | 0.2581899979999989 | 0.1902599909999978 | F | F | F |
| 0.799999999999972  | 0.2918100090000024 | 0.1691199950000026 | F | F | F |
| 0.8336300499999965 | 0.0250000010000022 | 0.1796899989999972 | F | F | F |
| 0.7724261027862341 | 0.2668080383541751 | 0.3493632100669078 | T | T | T |
| 0.3336300030000032 | 0.5249999790000004 | 0.1796899989999972 | F | F | F |
| 0.2655319796679140 | 0.7750805293559696 | 0.3514173847389442 | T | T | T |
| 0.5451611970143849 | 0.9168065790489802 | 0.2816270374139245 | T | T | T |
| 0.549999999999972  | 0.1331900059999995 | 0.0905399970000005 | F | F | F |
| 0.0346055411280766 | 0.4124655843656096 | 0.2781712477120308 | T | T | T |
| 0.049999999999972  | 0.6331899899999982 | 0.0905399970000005 | F | F | F |
| 0.7950467427858854 | 0.0442613441060587 | 0.3411566424087564 | T | T | T |
| 0.2813611273309901 | 0.9991322973107448 | 0.3539032948078248 | T | T | T |
| 0.3034298646825172 | 0.5448459317656776 | 0.3455432122121458 | T | T | T |
| 0.7931998355931500 | 0.4974002779006440 | 0.3675340760398492 | T | T | T |
| 0.7553195309590983 | 0.7801691012221483 | 0.3505236628643465 | T | T | T |
| 0.8336300499999965 | 0.5249999790000004 | 0.1796899989999972 | F | F | F |
| 0.2745164906269194 | 0.2701186430723987 | 0.3539446153019182 | T | T | T |
| 0.3336300030000032 | 0.0250000010000022 | 0.1796899989999972 | F | F | F |
| 0.0474136252852071 | 0.8806394947904279 | 0.2590811718314229 | T | T | T |
| 0.049999999999972  | 0.1668099999999981 | 0.1116699999999966 | F | F | F |
| 0.5489412533993867 | 0.3817596691788093 | 0.2572989251012425 | T | T | T |
| 0.549999999999972  | 0.6668099509999976 | 0.1116699999999966 | F | F | F |
| 0.549999999999972  | 0.4000000200000002 | 0.1011099950000016 | F | F | F |
| 0.0493571005114864 | 0.1481545960620215 | 0.2719290654647620 | T | T | T |

|                    |                    |                    |   |   |   |
|--------------------|--------------------|--------------------|---|---|---|
| 0.549999999999972  | 0.899999954000019  | 0.1011099950000016 | F | F | F |
| 0.0483534553956840 | 0.6472193006721983 | 0.2732252443736168 | T | T | T |
| 0.049999999999972  | 0.4000000200000002 | 0.1011099950000016 | F | F | F |
| 0.049999999999972  | 0.8999999540000019 | 0.1011099950000016 | F | F | F |
| 0.5498999384695923 | 0.6493479971344231 | 0.2656935610039474 | T | T | T |
| 0.5517757562135662 | 0.1492411585689807 | 0.2694356601930998 | T | T | T |
| 0.3322981976309853 | 0.5333777805967546 | 0.4717862175625072 | T | T | T |
| 0.5102672868813312 | 0.4376902852145825 | 0.4212629252207001 | T | T | T |
| 0.5548645138254573 | 0.6562379425180163 | 0.4248638660662821 | T | T | T |
| 0.7057312341298725 | 0.4972343583954467 | 0.4855375642315188 | T | T | T |
| 0.6825843499908598 | 0.6335572630316161 | 0.4913366004611821 | T | T | T |

Pd3Pt/In2O3

1.000000000000000

|                     |                     |                     |
|---------------------|---------------------|---------------------|
| 10.2175998688000007 | 0.0000000000000000  | 0.0000000000000000  |
| 0.0000000000000000  | 14.4497995377000006 | 0.0000000000000000  |
| 0.0000000000000000  | 0.0000000000000000  | 20.9857006073000001 |

|    |    |    |    |   |
|----|----|----|----|---|
| O  | In | Pd | Pt | C |
| 50 | 32 | 3  | 1  | 1 |

Selective dynamics

Direct

|                    |                    |                    |   |   |   |
|--------------------|--------------------|--------------------|---|---|---|
| 0.1819400070000015 | 0.5179200199999983 | 0.1152000000000015 | F | F | F |
| 0.6819400070000015 | 0.0179200010000002 | 0.1152000000000015 | F | F | F |
| 0.6795153641101581 | 0.0278260952629352 | 0.2538563757942963 | T | T | T |
| 0.1799308342189091 | 0.5177778521677154 | 0.2619700630025217 | T | T | T |
| 0.9182661468959923 | 0.3781275303970656 | 0.3587165363592802 | T | T | T |
| 0.4088090360790916 | 0.8832386941139400 | 0.3582531082246134 | T | T | T |
| 0.4205813799735557 | 0.6734398360141494 | 0.3478896962039997 | T | T | T |
| 0.9167903491657895 | 0.1629863413425169 | 0.3495026803610752 | T | T | T |
| 0.9545099699999966 | 0.3958000000000013 | 0.1866899999999987 | F | F | F |
| 0.4545100160000004 | 0.8957999670000021 | 0.1866899999999987 | F | F | F |
| 0.6412706035847080 | 0.7854741447497827 | 0.2646694745513139 | T | T | T |
| 0.1454727207839079 | 0.2864024102130961 | 0.2728642946719164 | T | T | T |
| 0.4545100160000004 | 0.1542000070000000 | 0.1726800109999971 | F | F | F |
| 0.9545099699999966 | 0.6542000230000014 | 0.1726800109999971 | F | F | F |
| 0.1454900069999994 | 0.7638599679999984 | 0.1037499959999977 | F | F | F |
| 0.6454899840000010 | 0.2638599839999998 | 0.1037499959999977 | F | F | F |
| 0.1903399939999986 | 0.2862900060000015 | 0.1125700079999987 | F | F | F |
| 0.6903399589999992 | 0.7862899730000024 | 0.1125700079999987 | F | F | F |
| 0.9096599470000015 | 0.8817800340000019 | 0.1725899979999994 | F | F | F |
| 0.4096599940000019 | 0.3817800010000028 | 0.1725899979999994 | F | F | F |
| 0.4096599940000019 | 0.6682199560000015 | 0.1867800019999990 | F | F | F |
| 0.9096599470000015 | 0.1682200059999985 | 0.1867800019999990 | F | F | F |

|                    |                     |                    |   |   |   |
|--------------------|---------------------|--------------------|---|---|---|
| 0.6894645105901210 | 0.2647959145471313  | 0.2527359402856765 | T | T | T |
| 0.1864909682472710 | 0.7621440018931497  | 0.2527714862611411 | T | T | T |
| 0.4180599930000000 | 0.7820899849999989  | 0.0870100030000032 | F | F | F |
| 0.9180600400000003 | 0.2820900179999981  | 0.0870100030000032 | F | F | F |
| 0.9162151534737791 | 0.7661766916735355  | 0.2847908458740460 | T | T | T |
| 0.4182796496063403 | 0.2666004817594532  | 0.2825626425589815 | T | T | T |
| 0.6819400070000015 | 0.4224300249999970  | 0.1752299990000026 | F | F | F |
| 0.1819400070000015 | 0.9224299589999987  | 0.1752299990000026 | F | F | F |
| 0.1819400070000015 | 0.1275800049999987  | 0.1841400010000029 | F | F | F |
| 0.6819400070000015 | 0.6275799969999980  | 0.1841400010000029 | F | F | F |
| 0.6474651891809777 | 0.3920920695946405  | 0.3484661441352309 | T | T | T |
| 0.1366752999590227 | 0.8965194440544455  | 0.3517421777250846 | T | T | T |
| 0.9567755588401662 | 0.0116964486366527  | 0.2704489698249552 | T | T | T |
| 0.4566427832207755 | 0.5138484617093326  | 0.2711750799476155 | T | T | T |
| 0.1475277575587431 | 0.6511227068889694  | 0.3627452400601390 | T | T | T |
| 0.6449761261289880 | 0.1505649454862108  | 0.3628509768669864 | T | T | T |
| 0.4545100160000004 | 0.5361400390000028  | 0.0984700050000029 | F | F | F |
| 0.9545099699999966 | 0.0361399980000030  | 0.0984700050000029 | F | F | F |
| 0.4096599940000019 | 0.0137100000000032  | 0.0896599969999983 | F | F | F |
| 0.9096599470000015 | 0.5137100339999989  | 0.0896599969999983 | F | F | F |
| 0.7138971959695457 | 0.9160177999300801  | 0.3668123162461948 | T | T | T |
| 0.3121172419817942 | 0.3946501836483581  | 0.3969351809876578 | T | T | T |
| 0.2011208970240883 | 0.1313757119428695  | 0.3567010663674319 | T | T | T |
| 0.6935311512702860 | 0.6427242362861629  | 0.3594963431760372 | T | T | T |
| 0.8980032998207447 | 0.5383856217461104  | 0.2822879331660743 | T | T | T |
| 0.4064081524906306 | 0.0384738159270203  | 0.2780569752594756 | T | T | T |
| 0.3894697604775529 | 0.6328955141074527  | 0.4896730643770852 | T | T | T |
| 0.7276725895712425 | 0.6702285989886182  | 0.5356676938052073 | T | T | T |
| 0.7999999999999972 | 0.7581899819999975  | 0.1902599909999978 | F | F | F |
| 0.3000000230000026 | 0.7918100090000024  | 0.1691199950000026 | F | F | F |
| 0.3000000230000026 | 0.2581899979999989  | 0.1902599909999978 | F | F | F |
| 0.7999999999999972 | 0.2918100090000024  | 0.1691199950000026 | F | F | F |
| 0.8336300499999965 | 0.0250000010000022  | 0.1796899989999972 | F | F | F |
| 0.7735917536852935 | 0.2678472800652862  | 0.3492972150970902 | T | T | T |
| 0.3336300030000032 | 0.5249999790000004  | 0.1796899989999972 | F | F | F |
| 0.2638697051939380 | 0.7744641281173629  | 0.3509723873036319 | T | T | T |
| 0.5446225417690737 | 0.9163149144112450  | 0.2815419192029914 | T | T | T |
| 0.5499999999999972 | 0.1331900059999995  | 0.0905399970000005 | F | F | F |
| 0.0338559669647838 | 0.4120936730927854  | 0.2785010149582947 | T | T | T |
| 0.0499999999999972 | 0.6331899899999982  | 0.0905399970000005 | F | F | F |
| 0.7945089801409715 | 0.0444496193586803  | 0.3415167824360547 | T | T | T |
| 0.2813540266045586 | -0.0005843844243046 | 0.3538467277674050 | T | T | T |
| 0.3011372776338108 | 0.5463560322394448  | 0.3453650910312595 | T | T | T |
| 0.7942408518623625 | 0.5010121274764714  | 0.3679595516031957 | T | T | T |

|                    |                    |                    |   |   |   |
|--------------------|--------------------|--------------------|---|---|---|
| 0.7607700624058704 | 0.7808726115001529 | 0.3492539019195043 | T | T | T |
| 0.8336300499999965 | 0.5249999790000004 | 0.1796899989999972 | F | F | F |
| 0.2734393648716382 | 0.2667546316183997 | 0.3540554466115257 | T | T | T |
| 0.3336300030000032 | 0.0250000010000022 | 0.1796899989999972 | F | F | F |
| 0.0487033189521693 | 0.8812199264215106 | 0.2583249256663269 | T | T | T |
| 0.0499999999999972 | 0.1668099999999981 | 0.1116699999999966 | F | F | F |
| 0.5490349378347776 | 0.3817961313565161 | 0.2570190059580109 | T | T | T |
| 0.5499999999999972 | 0.6668099509999976 | 0.1116699999999966 | F | F | F |
| 0.5499999999999972 | 0.4000000200000002 | 0.1011099950000016 | F | F | F |
| 0.0487606161413479 | 0.1477533845551059 | 0.2717117330171802 | T | T | T |
| 0.5499999999999972 | 0.8999999540000019 | 0.1011099950000016 | F | F | F |
| 0.0485584497546660 | 0.6470602334470139 | 0.2721692023082691 | T | T | T |
| 0.0499999999999972 | 0.4000000200000002 | 0.1011099950000016 | F | F | F |
| 0.0499999999999972 | 0.8999999540000019 | 0.1011099950000016 | F | F | F |
| 0.5486256900316843 | 0.6501222344662538 | 0.2675502337113079 | T | T | T |
| 0.5520582234970239 | 0.1491418570870770 | 0.2694969644557548 | T | T | T |
| 0.3223182096710349 | 0.5142598185712545 | 0.4679528921174439 | T | T | T |
| 0.5106931414660411 | 0.4320457352691432 | 0.4190349107815175 | T | T | T |
| 0.5407951458348605 | 0.6457954854139298 | 0.4303652405625458 | T | T | T |
| 0.7028584629668027 | 0.4923043469955994 | 0.4856356708601181 | T | T | T |
| 0.6694669104214772 | 0.6252768997983624 | 0.4970729778436879 | T | T | T |

#### Pd4/In2O3

1.0000000000000000

10.2175998688000007 0.0000000000000000 0.0000000000000000

0.0000000000000000 14.4497995377000006 0.0000000000000000

0.0000000000000000 0.0000000000000000 20.9857006073000001

O In Pd C  
50 32 4 1

#### Selective dynamics

##### Direct

|                    |                    |                    |   |   |   |
|--------------------|--------------------|--------------------|---|---|---|
| 0.1819400070000015 | 0.5179200199999983 | 0.1152000000000015 | F | F | F |
| 0.6819400070000015 | 0.0179200010000002 | 0.1152000000000015 | F | F | F |
| 0.6798282046542177 | 0.0281668762752469 | 0.2539770342014862 | T | T | T |
| 0.1795790590656354 | 0.5177756193249816 | 0.2618126746454076 | T | T | T |
| 0.9195121072696407 | 0.3783195818163183 | 0.3597190503718554 | T | T | T |
| 0.4094262577206114 | 0.8832067767169468 | 0.3580216186611623 | T | T | T |
| 0.4212367657948487 | 0.6730506320922668 | 0.3489727000093880 | T | T | T |
| 0.9180092020069617 | 0.1630789151848938 | 0.3496235503751471 | T | T | T |
| 0.9545099699999966 | 0.3958000000000013 | 0.1866899999999987 | F | F | F |
| 0.4545100160000004 | 0.8957999670000021 | 0.1866899999999987 | F | F | F |
| 0.6410029515388166 | 0.7859670212764873 | 0.2643291361992278 | T | T | T |
| 0.1455740841779246 | 0.2866244088156399 | 0.2727740441705189 | T | T | T |



|                    |                    |                    |   |   |   |
|--------------------|--------------------|--------------------|---|---|---|
| 0.4545100160000004 | 0.1542000070000000 | 0.1726800109999971 | F | F | F |
| 0.9545099699999966 | 0.6542000230000014 | 0.1726800109999971 | F | F | F |
| 0.1454900069999994 | 0.7638599679999984 | 0.1037499959999977 | F | F | F |
| 0.6454899840000010 | 0.2638599839999998 | 0.1037499959999977 | F | F | F |
| 0.1903399939999986 | 0.2862900060000015 | 0.1125700079999987 | F | F | F |
| 0.6903399589999992 | 0.7862899730000024 | 0.1125700079999987 | F | F | F |
| 0.9096599470000015 | 0.8817800340000019 | 0.1725899979999994 | F | F | F |
| 0.4096599940000019 | 0.3817800010000028 | 0.1725899979999994 | F | F | F |
| 0.4096599940000019 | 0.6682199560000015 | 0.1867800019999990 | F | F | F |
| 0.9096599470000015 | 0.1682200059999985 | 0.1867800019999990 | F | F | F |
| 0.6896327184685076 | 0.2644658162682471 | 0.2525700705003154 | T | T | T |
| 0.1868894580410388 | 0.7621541265003630 | 0.2527882693485630 | T | T | T |
| 0.4180599930000000 | 0.7820899849999989 | 0.0870100030000032 | F | F | F |
| 0.9180600400000003 | 0.2820900179999981 | 0.0870100030000032 | F | F | F |
| 0.9165037896416208 | 0.7665305116465685 | 0.2844048602677851 | T | T | T |
| 0.4182306435579322 | 0.2667999374230763 | 0.2827738589674543 | T | T | T |
| 0.6819400070000015 | 0.4224300249999970 | 0.1752299990000026 | F | F | F |
| 0.1819400070000015 | 0.9224299589999987 | 0.1752299990000026 | F | F | F |
| 0.1819400070000015 | 0.1275800049999987 | 0.1841400010000029 | F | F | F |
| 0.6819400070000015 | 0.6275799969999980 | 0.1841400010000029 | F | F | F |
| 0.6505629078168899 | 0.3923157464368632 | 0.3466515931914164 | T | T | T |
| 0.1372446793712750 | 0.8968229519670867 | 0.3517412049910265 | T | T | T |
| 0.9570408910829485 | 0.0117675454405949 | 0.2704714957921512 | T | T | T |
| 0.4563931476411465 | 0.5142714717660167 | 0.2710077589961815 | T | T | T |
| 0.1476545013355113 | 0.6517082704011538 | 0.3624751993396494 | T | T | T |
| 0.6460207402609102 | 0.1510606242029600 | 0.3629230581974212 | T | T | T |
| 0.4545100160000004 | 0.5361400390000028 | 0.0984700050000029 | F | F | F |
| 0.9545099699999966 | 0.0361399980000030 | 0.0984700050000029 | F | F | F |
| 0.4096599940000019 | 0.0137100000000032 | 0.0896599969999983 | F | F | F |
| 0.9096599470000015 | 0.5137100339999989 | 0.0896599969999983 | F | F | F |
| 0.7146116184119204 | 0.9167690383582194 | 0.3672984133408282 | T | T | T |
| 0.3112696487160299 | 0.3941650346142729 | 0.3975155842380088 | T | T | T |
| 0.2014155471946807 | 0.1313828558198738 | 0.3564872401817698 | T | T | T |
| 0.6926237880269667 | 0.6453299912788351 | 0.3607196093256921 | T | T | T |
| 0.8976573801580199 | 0.5385276185147679 | 0.2824271502804891 | T | T | T |
| 0.4067243305534184 | 0.0387199083862851 | 0.2780087345403818 | T | T | T |
| 0.7218324341066399 | 0.6738747871882115 | 0.5397652031000127 | T | T | T |
| 0.3856567574627496 | 0.6316798555681670 | 0.4898413946168602 | T | T | T |
| 0.7999999999999972 | 0.7581899819999975 | 0.1902599909999978 | F | F | F |
| 0.3000000230000026 | 0.7918100090000024 | 0.1691199950000026 | F | F | F |
| 0.3000000230000026 | 0.2581899979999989 | 0.1902599909999978 | F | F | F |
| 0.7999999999999972 | 0.2918100090000024 | 0.1691199950000026 | F | F | F |
| 0.8336300499999965 | 0.0250000010000022 | 0.1796899989999972 | F | F | F |
| 0.7748643066066767 | 0.2679774312981862 | 0.3490108744403214 | T | T | T |

|                    |                     |                    |   |   |   |
|--------------------|---------------------|--------------------|---|---|---|
| 0.3336300030000032 | 0.5249999790000004  | 0.1796899989999972 | F | F | F |
| 0.2642309680093794 | 0.7747301978337267  | 0.3508874290702454 | T | T | T |
| 0.5447323132488768 | 0.9168356863765772  | 0.2811221062877760 | T | T | T |
| 0.5499999999999972 | 0.1331900059999995  | 0.0905399970000005 | F | F | F |
| 0.0334086497735925 | 0.4122032414832366  | 0.2787132978809623 | T | T | T |
| 0.0499999999999972 | 0.6331899899999982  | 0.0905399970000005 | F | F | F |
| 0.7952083635171081 | 0.0448076385795576  | 0.3415511812691603 | T | T | T |
| 0.2819482449401530 | -0.0003858831702654 | 0.3538993402849825 | T | T | T |
| 0.3001801222164222 | 0.5462549586951212  | 0.3451860883471813 | T | T | T |
| 0.7944415318320110 | 0.5017479732633618  | 0.3688238089555035 | T | T | T |
| 0.7613605415392726 | 0.7821822759748340  | 0.3487173055681268 | T | T | T |
| 0.8336300499999965 | 0.5249999790000004  | 0.1796899989999972 | F | F | F |
| 0.2729226694300825 | 0.2670083226267000  | 0.3543781363007067 | T | T | T |
| 0.3336300030000032 | 0.0250000010000022  | 0.1796899989999972 | F | F | F |
| 0.0492812075612389 | 0.8814575024059064  | 0.2582550688825706 | T | T | T |
| 0.0499999999999972 | 0.1668099999999981  | 0.1116699999999966 | F | F | F |
| 0.5489802394547615 | 0.3818190738347589  | 0.2565937665531712 | T | T | T |
| 0.5499999999999972 | 0.6668099509999976  | 0.1116699999999966 | F | F | F |
| 0.5499999999999972 | 0.4000000200000002  | 0.1011099950000016 | F | F | F |
| 0.0492236478790459 | 0.1478396525475109  | 0.2715736596351688 | T | T | T |
| 0.5499999999999972 | 0.8999999540000019  | 0.1011099950000016 | F | F | F |
| 0.0483307084335733 | 0.6471021490038059  | 0.2720907405662253 | T | T | T |
| 0.0499999999999972 | 0.4000000200000002  | 0.1011099950000016 | F | F | F |
| 0.0499999999999972 | 0.8999999540000019  | 0.1011099950000016 | F | F | F |
| 0.5489885011302670 | 0.6503360488810799  | 0.2677743656631202 | T | T | T |
| 0.5522124097209050 | 0.1495113578083306  | 0.2696752926316902 | T | T | T |
| 0.3239070099309564 | 0.5120691397153636  | 0.4665694820997430 | T | T | T |
| 0.5155135081915329 | 0.4365355948209371  | 0.4149752628227276 | T | T | T |
| 0.6999173948836421 | 0.5002768721232875  | 0.4876760549684944 | T | T | T |
| 0.5388281502186225 | 0.6467596774291460  | 0.4311594050907955 | T | T | T |
| 0.6630375117201532 | 0.6340722634411201  | 0.4993700273561507 | T | T | T |

### PdPt3/In2O3

1.0000000000000000

|                     |                     |                     |
|---------------------|---------------------|---------------------|
| 10.2175998688000007 | 0.0000000000000000  | 0.0000000000000000  |
| 0.0000000000000000  | 14.4497995377000006 | 0.0000000000000000  |
| 0.0000000000000000  | 0.0000000000000000  | 20.9857006073000001 |

| O  | In | Pd | Pt | C |
|----|----|----|----|---|
| 50 | 32 | 1  | 3  | 1 |

### Selective dynamics

#### Direct

|                    |                    |                    |   |   |   |
|--------------------|--------------------|--------------------|---|---|---|
| 0.1819400070000015 | 0.5179200199999983 | 0.1152000000000015 | F | F | F |
| 0.6819400070000015 | 0.0179200010000002 | 0.1152000000000015 | F | F | F |

|                    |                    |                    |   |   |   |
|--------------------|--------------------|--------------------|---|---|---|
| 0.6795766836423482 | 0.0282986906695936 | 0.2533329345456494 | T | T | T |
| 0.1808828305404527 | 0.5179156198186556 | 0.2627953389389139 | T | T | T |
| 0.9136070780901149 | 0.3755152822985671 | 0.3570371800008681 | T | T | T |
| 0.4084848561160984 | 0.8838096793679455 | 0.3581585894352526 | T | T | T |
| 0.4253215936049020 | 0.6746978662652138 | 0.3469562314937025 | T | T | T |
| 0.9161459736018591 | 0.1619453024403499 | 0.3497988943125845 | T | T | T |
| 0.9545099699999966 | 0.3958000000000013 | 0.1866899999999987 | F | F | F |
| 0.4545100160000004 | 0.8957999670000021 | 0.1866899999999987 | F | F | F |
| 0.6415043750322024 | 0.7858071945684352 | 0.2643093416053917 | T | T | T |
| 0.1449736399631841 | 0.2865038300669678 | 0.2730033382017296 | T | T | T |
| 0.4545100160000004 | 0.1542000070000000 | 0.1726800109999971 | F | F | F |
| 0.9545099699999966 | 0.6542000230000014 | 0.1726800109999971 | F | F | F |
| 0.1454900069999994 | 0.7638599679999984 | 0.1037499959999977 | F | F | F |
| 0.6454899840000010 | 0.2638599839999998 | 0.1037499959999977 | F | F | F |
| 0.1903399939999986 | 0.2862900060000015 | 0.1125700079999987 | F | F | F |
| 0.6903399589999992 | 0.7862899730000024 | 0.1125700079999987 | F | F | F |
| 0.9096599470000015 | 0.8817800340000019 | 0.1725899979999994 | F | F | F |
| 0.4096599940000019 | 0.3817800010000028 | 0.1725899979999994 | F | F | F |
| 0.4096599940000019 | 0.6682199560000015 | 0.1867800019999990 | F | F | F |
| 0.9096599470000015 | 0.1682200059999985 | 0.1867800019999990 | F | F | F |
| 0.6894442754666014 | 0.2658099108004698 | 0.2532772431216714 | T | T | T |
| 0.1860787522534353 | 0.7617641129960089 | 0.2531823736358636 | T | T | T |
| 0.4180599930000000 | 0.7820899849999989 | 0.0870100030000032 | F | F | F |
| 0.9180600400000003 | 0.2820900179999981 | 0.0870100030000032 | F | F | F |
| 0.9146800469883805 | 0.7653194387144210 | 0.2865667820181803 | T | T | T |
| 0.4181840230514174 | 0.2660923289757586 | 0.2819456703922503 | T | T | T |
| 0.6819400070000015 | 0.4224300249999970 | 0.1752299990000026 | F | F | F |
| 0.1819400070000015 | 0.9224299589999987 | 0.1752299990000026 | F | F | F |
| 0.1819400070000015 | 0.1275800049999987 | 0.1841400010000029 | F | F | F |
| 0.6819400070000015 | 0.6275799969999980 | 0.1841400010000029 | F | F | F |
| 0.6378862192715923 | 0.3887351551790541 | 0.3518345721503942 | T | T | T |
| 0.1367984056939812 | 0.8964583485285778 | 0.3519590721863654 | T | T | T |
| 0.9571634012303268 | 0.0115146027964364 | 0.2702432779048120 | T | T | T |
| 0.4572138977660333 | 0.5138454115020892 | 0.2701059190660885 | T | T | T |
| 0.1525654254434924 | 0.6500940079961108 | 0.3636390920879491 | T | T | T |
| 0.6433848583791203 | 0.1489720522808521 | 0.3627109798569484 | T | T | T |
| 0.4545100160000004 | 0.5361400390000028 | 0.0984700050000029 | F | F | F |
| 0.9545099699999966 | 0.0361399980000030 | 0.0984700050000029 | F | F | F |
| 0.4096599940000019 | 0.0137100000000032 | 0.0896599969999983 | F | F | F |
| 0.9096599470000015 | 0.5137100339999989 | 0.0896599969999983 | F | F | F |
| 0.7117692649434945 | 0.9166913279925256 | 0.3658942318045586 | T | T | T |
| 0.3112699378504838 | 0.3983372057733005 | 0.3941225732245962 | T | T | T |
| 0.2018195701180200 | 0.1324284680343727 | 0.3568985929713830 | T | T | T |
| 0.6954444280285318 | 0.6369143342642511 | 0.3527118834187386 | T | T | T |

|                    |                    |                    |   |   |   |
|--------------------|--------------------|--------------------|---|---|---|
| 0.8992479418768448 | 0.5368578998157092 | 0.2826217528959470 | T | T | T |
| 0.4061179208212748 | 0.0384718747981497 | 0.2779083978267165 | T | T | T |
| 0.7388403287836306 | 0.6668820316257564 | 0.5359560532417608 | T | T | T |
| 0.4052872402173295 | 0.6574150367033493 | 0.4835185494813490 | T | T | T |
| 0.7999999999999972 | 0.7581899819999975 | 0.1902599909999978 | F | F | F |
| 0.3000000230000026 | 0.7918100090000024 | 0.1691199950000026 | F | F | F |
| 0.3000000230000026 | 0.2581899979999989 | 0.1902599909999978 | F | F | F |
| 0.7999999999999972 | 0.2918100090000024 | 0.1691199950000026 | F | F | F |
| 0.8336300499999965 | 0.0250000010000022 | 0.1796899989999972 | F | F | F |
| 0.7706953840399313 | 0.2656583850524708 | 0.3501298684201036 | T | T | T |
| 0.3336300030000032 | 0.5249999790000004 | 0.1796899989999972 | F | F | F |
| 0.2654557005759176 | 0.7747022276114227 | 0.3514755165706078 | T | T | T |
| 0.5449573217542381 | 0.9164553839645053 | 0.2816568142962380 | T | T | T |
| 0.5499999999999972 | 0.1331900059999995 | 0.0905399970000005 | F | F | F |
| 0.0339288352116546 | 0.4122370983876011 | 0.2784111812965337 | T | T | T |
| 0.0499999999999972 | 0.6331899899999982 | 0.0905399970000005 | F | F | F |
| 0.7947364335241551 | 0.0436245404491883 | 0.3412177381353321 | T | T | T |
| 0.2808202734118850 | 0.9997954327690687 | 0.3537271318177085 | T | T | T |
| 0.3055611600930972 | 0.5450196622206925 | 0.3462949208007905 | T | T | T |
| 0.7918976386224575 | 0.4972426215002260 | 0.3681334275257020 | T | T | T |
| 0.7556014841845287 | 0.7798925492940696 | 0.3507718337448819 | T | T | T |
| 0.8336300499999965 | 0.5249999790000004 | 0.1796899989999972 | F | F | F |
| 0.2745586597067521 | 0.2676219756377304 | 0.3535147597959619 | T | T | T |
| 0.3336300030000032 | 0.0250000010000022 | 0.1796899989999972 | F | F | F |
| 0.0472503858723039 | 0.8801272724259777 | 0.2590373612106525 | T | T | T |
| 0.0499999999999972 | 0.1668099999999981 | 0.1116699999999966 | F | F | F |
| 0.5481981641788137 | 0.3816417200715365 | 0.2572293403731067 | T | T | T |
| 0.5499999999999972 | 0.6668099509999976 | 0.1116699999999966 | F | F | F |
| 0.5499999999999972 | 0.4000000200000002 | 0.1011099950000016 | F | F | F |
| 0.0485167156385825 | 0.1477709869366845 | 0.2719419764623153 | T | T | T |
| 0.5499999999999972 | 0.8999999540000019 | 0.1011099950000016 | F | F | F |
| 0.0487167662792407 | 0.6466583692252152 | 0.2734679264410160 | T | T | T |
| 0.0499999999999972 | 0.4000000200000002 | 0.1011099950000016 | F | F | F |
| 0.0499999999999972 | 0.8999999540000019 | 0.1011099950000016 | F | F | F |
| 0.5498839123968565 | 0.6496203403887569 | 0.2656962860053845 | T | T | T |
| 0.5517668587963130 | 0.1488314134669840 | 0.2692341309227697 | T | T | T |
| 0.3301039804123411 | 0.5356480681943500 | 0.4744403283379883 | T | T | T |
| 0.5038647470550743 | 0.4381240408371078 | 0.4212141560873319 | T | T | T |
| 0.5554144128844153 | 0.6578662653816116 | 0.4251386168283245 | T | T | T |
| 0.6993507834577977 | 0.4950071879114189 | 0.4849509477627080 | T | T | T |
| 0.6785810313954986 | 0.6316358594400874 | 0.4930592513618491 | T | T | T |

1.000000000000000

|                     |                     |                     |
|---------------------|---------------------|---------------------|
| 10.2175998688000007 | 0.0000000000000000  | 0.0000000000000000  |
| 0.0000000000000000  | 14.4497995377000006 | 0.0000000000000000  |
| 0.0000000000000000  | 0.0000000000000000  | 20.9857006073000001 |

|    |    |    |   |
|----|----|----|---|
| O  | In | Pt | C |
| 50 | 32 | 4  | 1 |

Selective dynamics

Direct

|                    |                    |                    |   |   |   |
|--------------------|--------------------|--------------------|---|---|---|
| 0.1819400070000015 | 0.5179200199999983 | 0.1152000000000015 | F | F | F |
| 0.6819400070000015 | 0.0179200010000002 | 0.1152000000000015 | F | F | F |
| 0.6803122443635218 | 0.0276154722415163 | 0.2536519376065069 | T | T | T |
| 0.1807476803716748 | 0.5178039291305805 | 0.2648439749360441 | T | T | T |
| 0.9111986793033063 | 0.3776579487036690 | 0.3573973906233909 | T | T | T |
| 0.4094525307553357 | 0.8836044373960932 | 0.3583554357278121 | T | T | T |
| 0.4278591068214132 | 0.6762161768101683 | 0.3488558681151242 | T | T | T |
| 0.9139165522705219 | 0.1638475663345448 | 0.3495936121015584 | T | T | T |
| 0.9545099699999966 | 0.3958000000000013 | 0.1866899999999987 | F | F | F |
| 0.4545100160000004 | 0.8957999670000021 | 0.1866899999999987 | F | F | F |
| 0.6421710193611757 | 0.7876588109990195 | 0.2634227656601233 | T | T | T |
| 0.1434698672401568 | 0.2855954922225461 | 0.2724183524665281 | T | T | T |
| 0.4545100160000004 | 0.1542000070000000 | 0.1726800109999971 | F | F | F |
| 0.9545099699999966 | 0.6542000230000014 | 0.1726800109999971 | F | F | F |
| 0.1454900069999994 | 0.7638599679999984 | 0.1037499959999977 | F | F | F |
| 0.6454899840000010 | 0.2638599839999998 | 0.1037499959999977 | F | F | F |
| 0.1903399939999986 | 0.2862900060000015 | 0.1125700079999987 | F | F | F |
| 0.6903399589999992 | 0.7862899730000024 | 0.1125700079999987 | F | F | F |
| 0.9096599470000015 | 0.8817800340000019 | 0.1725899979999994 | F | F | F |
| 0.4096599940000019 | 0.3817800010000028 | 0.1725899979999994 | F | F | F |
| 0.4096599940000019 | 0.6682199560000015 | 0.1867800019999990 | F | F | F |
| 0.9096599470000015 | 0.1682200059999985 | 0.1867800019999990 | F | F | F |
| 0.6898604234031306 | 0.2674192287112850 | 0.2540316526094733 | T | T | T |
| 0.1878768241025571 | 0.7615923953907471 | 0.2532736767292494 | T | T | T |
| 0.4180599930000000 | 0.7820899849999989 | 0.0870100030000032 | F | F | F |
| 0.9180600400000003 | 0.2820900179999981 | 0.0870100030000032 | F | F | F |
| 0.9185200561772994 | 0.7654655257000075 | 0.2851355142456600 | T | T | T |
| 0.4191622984120002 | 0.2633788408695266 | 0.2799042045613174 | T | T | T |
| 0.6819400070000015 | 0.4224300249999970 | 0.1752299990000026 | F | F | F |
| 0.1819400070000015 | 0.9224299589999987 | 0.1752299990000026 | F | F | F |
| 0.1819400070000015 | 0.1275800049999987 | 0.1841400010000029 | F | F | F |
| 0.6819400070000015 | 0.6275799969999980 | 0.1841400010000029 | F | F | F |
| 0.6326949944640592 | 0.3894532205122345 | 0.3560244284940347 | T | T | T |
| 0.1374534244432397 | 0.8965782387962656 | 0.3516171258940390 | T | T | T |
| 0.9567865210291615 | 0.0116358652375833 | 0.2707046466689936 | T | T | T |
| 0.4565870403795312 | 0.5155386780031332 | 0.2715677389578812 | T | T | T |

|                    |                     |                    |   |   |   |
|--------------------|---------------------|--------------------|---|---|---|
| 0.1541293086048725 | 0.6513352992431023  | 0.3643571711510023 | T | T | T |
| 0.6419669821689887 | 0.1484137477267409  | 0.3626496603744233 | T | T | T |
| 0.4545100160000004 | 0.5361400390000028  | 0.0984700050000029 | F | F | F |
| 0.9545099699999966 | 0.0361399980000030  | 0.0984700050000029 | F | F | F |
| 0.4096599940000019 | 0.0137100000000032  | 0.0896599969999983 | F | F | F |
| 0.9096599470000015 | 0.5137100339999989  | 0.0896599969999983 | F | F | F |
| 0.7137219610624261 | 0.9165564557704727  | 0.3678300949688861 | T | T | T |
| 0.3247813255742081 | 0.3947681617247081  | 0.3797966989844389 | T | T | T |
| 0.1994565390629255 | 0.1309413792462907  | 0.3573711472161012 | T | T | T |
| 0.6969705056513439 | 0.6429053274654604  | 0.3515348405997024 | T | T | T |
| 0.8984296139009090 | 0.5376921498506760  | 0.2825708486135934 | T | T | T |
| 0.4064457964062915 | 0.0385458568500152  | 0.2779212533398257 | T | T | T |
| 0.3131206833227818 | 0.3982218310117077  | 0.5479349160353012 | T | T | T |
| 0.6509271825975189 | 0.4017570222320234  | 0.4907214567357703 | T | T | T |
| 0.799999999999972  | 0.7581899819999975  | 0.1902599909999978 | F | F | F |
| 0.3000000230000026 | 0.7918100090000024  | 0.1691199950000026 | F | F | F |
| 0.3000000230000026 | 0.2581899979999989  | 0.1902599909999978 | F | F | F |
| 0.799999999999972  | 0.2918100090000024  | 0.1691199950000026 | F | F | F |
| 0.8336300499999965 | 0.0250000010000022  | 0.1796899989999972 | F | F | F |
| 0.7669442935735321 | 0.2675363943490242  | 0.3521183483872499 | T | T | T |
| 0.3336300030000032 | 0.5249999790000004  | 0.1796899989999972 | F | F | F |
| 0.2657196606431648 | 0.7751681319454167  | 0.3508287616358859 | T | T | T |
| 0.5441860014099863 | 0.9171291661051316  | 0.2811608369186604 | T | T | T |
| 0.549999999999972  | 0.1331900059999995  | 0.0905399970000005 | F | F | F |
| 0.0331971655840007 | 0.4120070600535558  | 0.2789306430061796 | T | T | T |
| 0.049999999999972  | 0.6331899899999982  | 0.0905399970000005 | F | F | F |
| 0.7942022555107333 | 0.0446224208419716  | 0.3419048095972004 | T | T | T |
| 0.2815756072377594 | -0.0003014275906365 | 0.3536534534157749 | T | T | T |
| 0.3038563360194764 | 0.5420871657014933  | 0.3514415497202487 | T | T | T |
| 0.7881985695886469 | 0.4976784339090694  | 0.3673781970478519 | T | T | T |
| 0.7609470883729507 | 0.7825874751735046  | 0.3479837781430370 | T | T | T |
| 0.8336300499999965 | 0.5249999790000004  | 0.1796899989999972 | F | F | F |
| 0.2760176436357398 | 0.2632243016335283  | 0.3511826879098146 | T | T | T |
| 0.3336300030000032 | 0.0250000010000022  | 0.1796899989999972 | F | F | F |
| 0.0491809996144016 | 0.8811010570402127  | 0.2582858943070825 | T | T | T |
| 0.049999999999972  | 0.1668099999999981  | 0.1116699999999966 | F | F | F |
| 0.5465697317398330 | 0.3826495921934733  | 0.2596958850788268 | T | T | T |
| 0.549999999999972  | 0.6668099509999976  | 0.1116699999999966 | F | F | F |
| 0.549999999999972  | 0.4000000200000002  | 0.1011099950000016 | F | F | F |
| 0.0458352541096937 | 0.1484951755678611  | 0.2716646142019538 | T | T | T |
| 0.549999999999972  | 0.8999999540000019  | 0.1011099950000016 | F | F | F |
| 0.0511818030223961 | 0.6455612165342005  | 0.2732255702169881 | T | T | T |
| 0.049999999999972  | 0.4000000200000002  | 0.1011099950000016 | F | F | F |
| 0.049999999999972  | 0.8999999540000019  | 0.1011099950000016 | F | F | F |

|                    |                    |                    |   |   |   |
|--------------------|--------------------|--------------------|---|---|---|
| 0.5492941679232997 | 0.6506629917394036 | 0.2656504955479537 | T | T | T |
| 0.5541604268267747 | 0.1489493584162317 | 0.2681667788632910 | T | T | T |
| 0.3523375808137570 | 0.5618995636386720 | 0.4832781764601866 | T | T | T |
| 0.4938759123953599 | 0.3965722403650698 | 0.4360058408982842 | T | T | T |
| 0.7059020331073668 | 0.5265350823084834 | 0.4849030414154673 | T | T | T |
| 0.5467341795582419 | 0.6155533251051224 | 0.4178845769641208 | T | T | T |
| 0.3746542343031350 | 0.4289039570438839 | 0.5040300679106602 | T | T | T |
