# Supplementary material for: CO2 activation and dissociation on In2O3(110) supported PdnPt(4−n) (n = 0–4) catalysts: a density functional theory study
Source: Royal Society of Chemistry journal article supplement (doi:10.1039/d1cp01015h), 2021-01-01
Supplement: d1cp01015h2.pdf [file d1cp01015h2.pdf]

## Supplementary Materials for

### CO<sub>2</sub> Activation and Dissociation on In<sub>2</sub>O<sub>3</sub> (110) Supported Pd<sub>n</sub>Pt(4-n)

#### (n = 0-4) Catalysts: A Density Functional Theory Study

Xiaowen Wang<sup>1</sup>, Jiaying Pan<sup>1,\*</sup>, Haiqiao Wei<sup>1,\*</sup>, Wenjia Li<sup>2</sup>, Jun Zhao<sup>2</sup>

Zhen Hu<sup>1</sup>

*State Key Laboratory of Engines, Tianjin University, China*

*Key Laboratory of Efficient Utilization of Low and Medium Grade*

*Energy, Tianjin University, China*

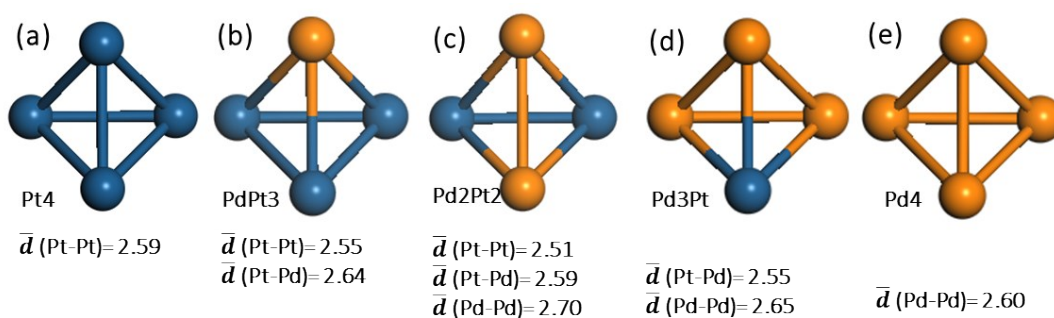

**Fig. S1. Optimized structures of Pt<sub>n</sub>Pd(4-n) (n = 0 – 4) clusters (bond lengths in angstroms (Å) and angles in degrees (°)). Blue and orange spheres represent Pt and Pd atoms, respectively.**

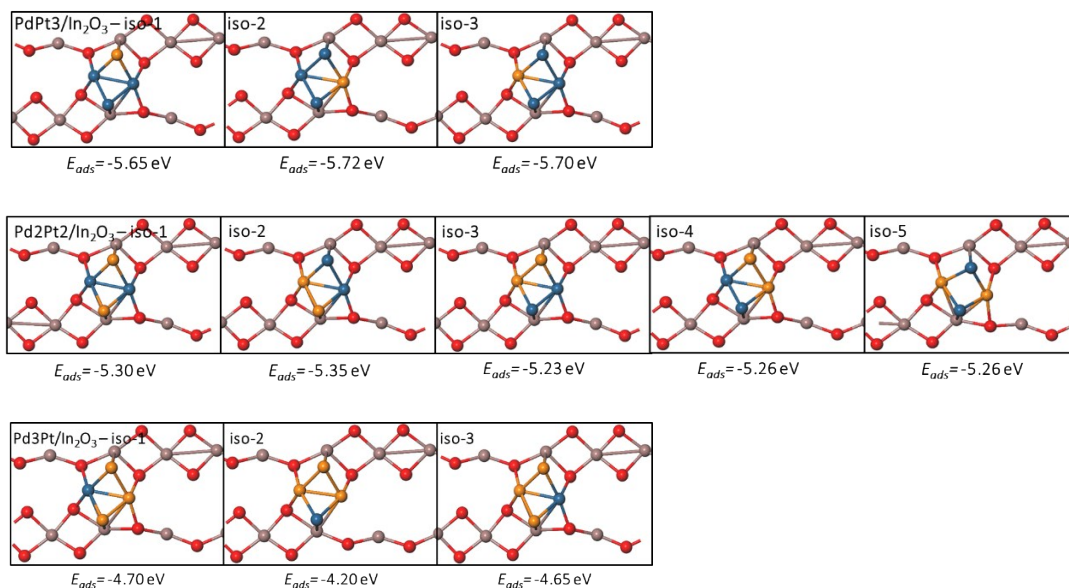

**Fig. S2.** Minor energy stable structures and binding energy  $E_{bind}$  of Pt<sub>3</sub>Pd/In<sub>2</sub>O<sub>3</sub>, Pt<sub>2</sub>Pd<sub>2</sub>/In<sub>2</sub>O<sub>3</sub>, and PtPd<sub>3</sub>/In<sub>2</sub>O<sub>3</sub> catalysts.

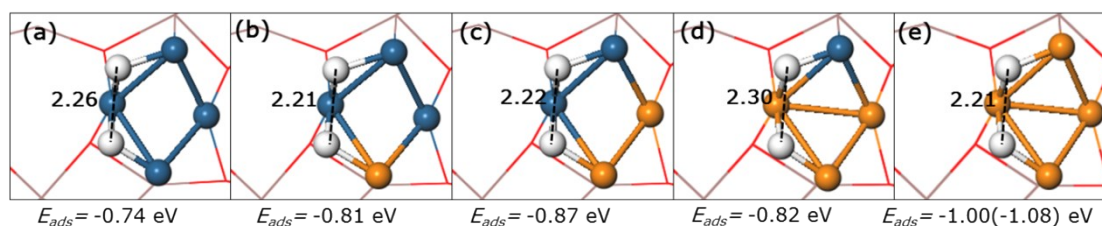

**Fig. S3.** The optimized structures along with adsorption energies for H<sub>2</sub> adsorption on PtnPd(4-n)/In<sub>2</sub>O<sub>3</sub> catalysts. The data of the Pd<sub>4</sub>/In<sub>2</sub>O<sub>3</sub> case in brackets are the results reported by Ye *et. al.*<sup>1</sup>

## References

- (1) Jingyun Ye A, B.; Chang-jun, L.; Donghai, M.; Qingfeng, G. Methanol synthesis from CO<sub>2</sub> hydrogenation over a Pd<sub>4</sub>/In<sub>2</sub>O<sub>3</sub> model catalyst: A combined DFT and kinetic study. *J. Catal.* **2014**, 317, 44-53.
